# Supplementary material for: A Comparative Study on Luminescence Properties of Y2O3: Pr3+ Nanocrystals Prepared by Different Synthesis Methods
Source: PubMed Central journal article supplement (PMC7466516; doi:10.3390/nano10081574), 2020-08-11
Supplement: nanomaterials-10-01574-s001.pdf [file nanomaterials-10-01574-s001.pdf]

## SUPPORTING INFORMATION

### A Comparative Study on Luminescence Properties of $\text{Y}_2\text{O}_3: \text{Pr}^{3+}$ Nanocrystals Prepared by Different Synthesis Methods

#### Contents

|                                                        |     |
|--------------------------------------------------------|-----|
| 1. Powder X-ray Diffraction (PXRD) Analysis.....       | S2  |
| 2. Raman Spectroscopy.....                             | S3  |
| 3. Reflectance Spectroscopy.....                       | S5  |
| 4. Thermogravimetric Analysis (TGA+DSC) .....          | S6  |
| 5. Transmission Electron Microscopy (TEM) Images ..... | S7  |
| 6. Fluorescence Emission Spectroscopy.....             | S18 |
| 7. Fluorescence Excitation Spectroscopy.....           | S20 |
| 8. Luminescence Lifetime ( $\tau$ ).....               | S22 |

## 1. Powder X-Ray Diffraction (PXRD) Analysis

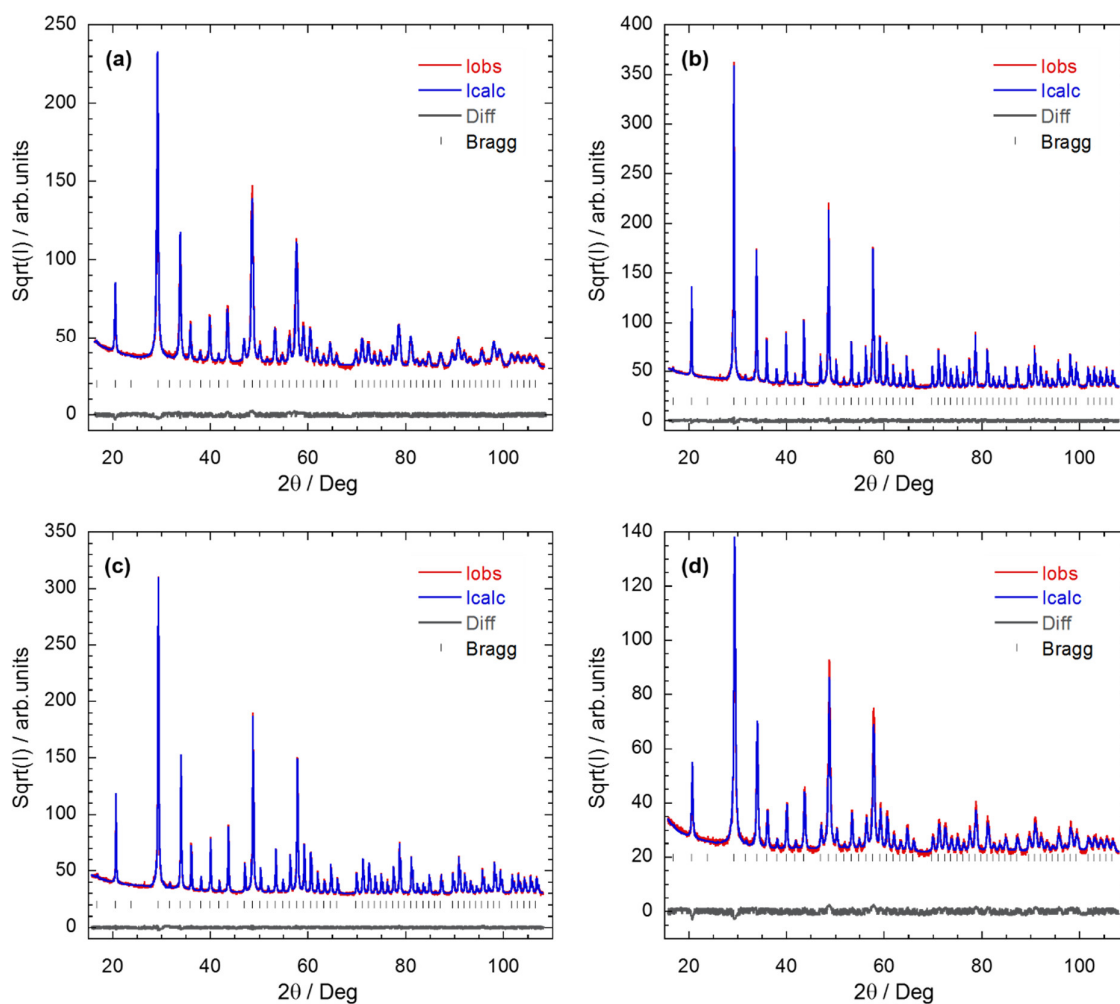

**Figure S1.** XRD patterns of  $\text{Y}_2\text{O}_3:\text{Pr}^{3+}$  NCs obtained by (a) combustion method after calcination at 900 °C for 4 h; (b) molten salt method at 500 °C followed by 10 washing cycles; (c) sol-gel Pechini method using citric acid as chelating agent and followed by thermal treatment at 900 °C for 16 h; and (d) homogeneous precipitation using 0.832 mol of urea and 200 ml  $\text{H}_2\text{O}$  during 2 h reaction followed by thermal treatment at 800 °C for 3 h.

## 2. Raman Spectroscopy

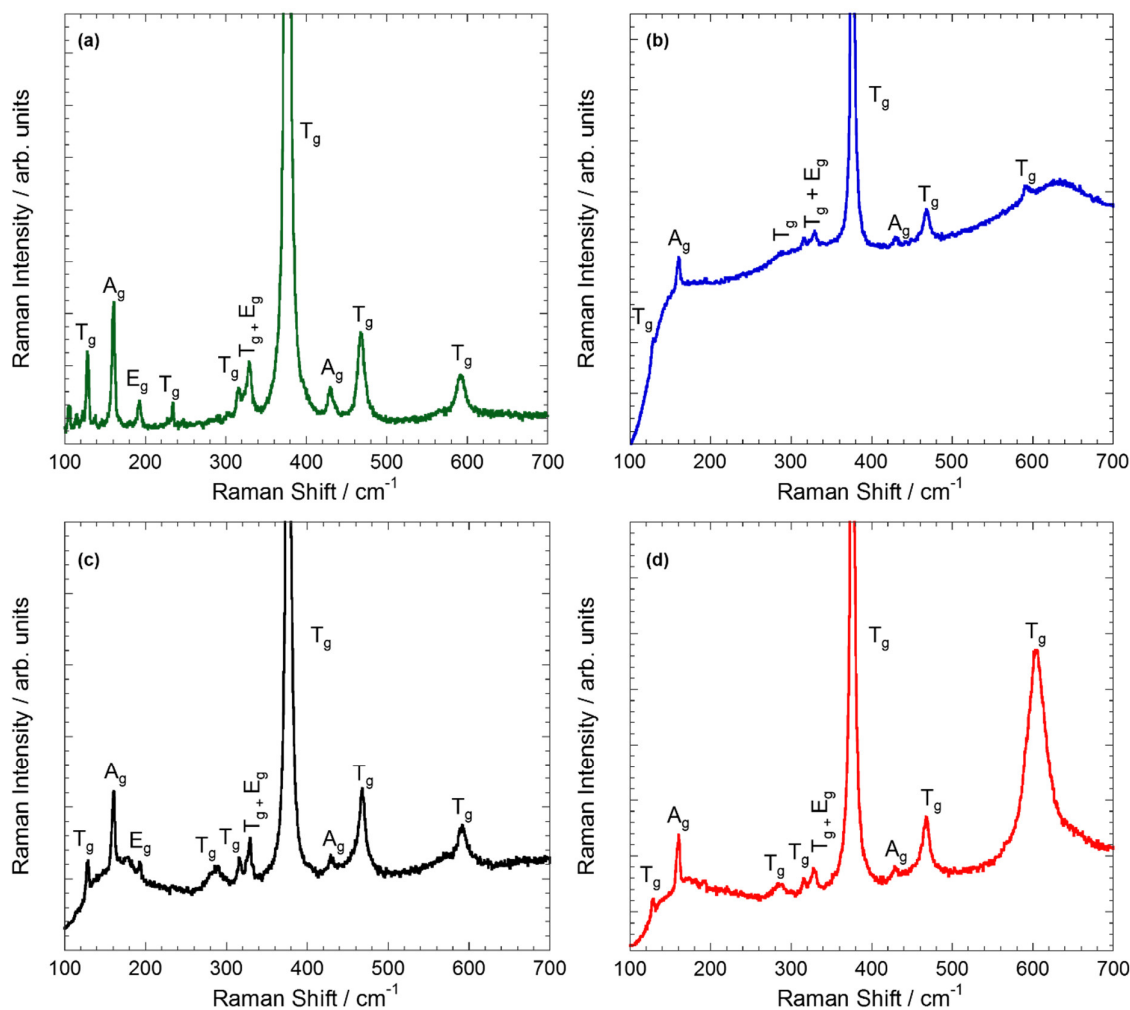

**Figure S2.** Raman spectra of  $\text{Y}_2\text{O}_3:\text{Pr}^{3+}$  NCs obtained by (a) combustion method after calcination at 900 °C for 4 h; (b) molten salt method at 500 °C followed by 10 washing cycles; (c) sol-gel Pechini method using citric acid as chelating agent and followed by thermal treatment at 900 °C for 16 h; and (d) homogeneous precipitation method using 0.832 mol of urea and 200 ml of deionized water during 2 h reaction followed by thermal treatment at 800 °C for 3 h.

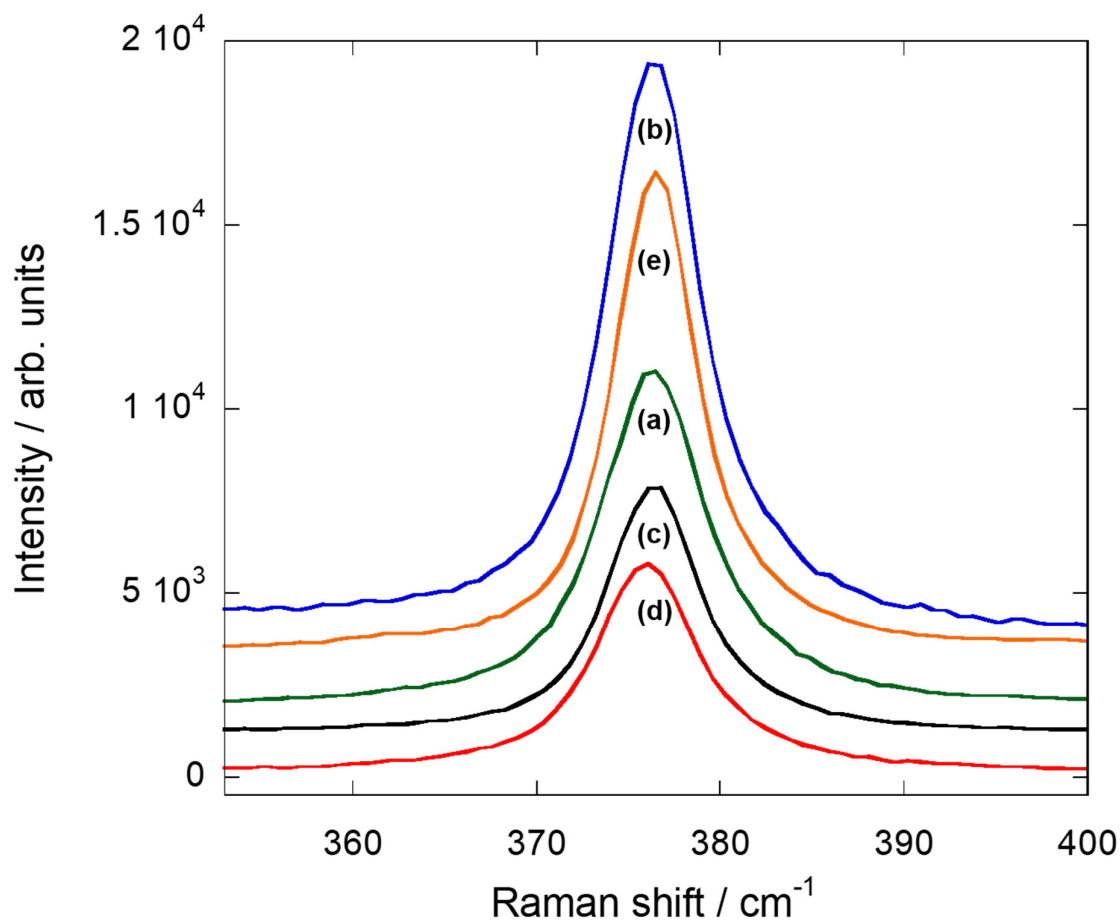

**Figure S3.** Comparison of the most prominent Raman peak of  $\text{Y}_2\text{O}_3:\text{Pr}^{3+}$  NCs prepared by (a) combustion method after calcination at  $900\text{ }^\circ\text{C}$  for 4h; (b) molten salt method at  $500\text{ }^\circ\text{C}$  followed by 10 washing cycles; (c) sol-gel Pechini method using citric acid as chelating agent and followed by thermal treatment at  $900\text{ }^\circ\text{C}$  for 16 h; (d) homogeneous precipitation method using 0.832 mol of urea and 200 ml of water during 2 h reaction followed by thermal treatment at  $800\text{ }^\circ\text{C}$  for 3 h; and (e) solvothermal method at  $220\text{ }^\circ\text{C}$  followed by calcination at  $1000\text{ }^\circ\text{C}$  for 4 h.



### 3. Reflectance Spectroscopy

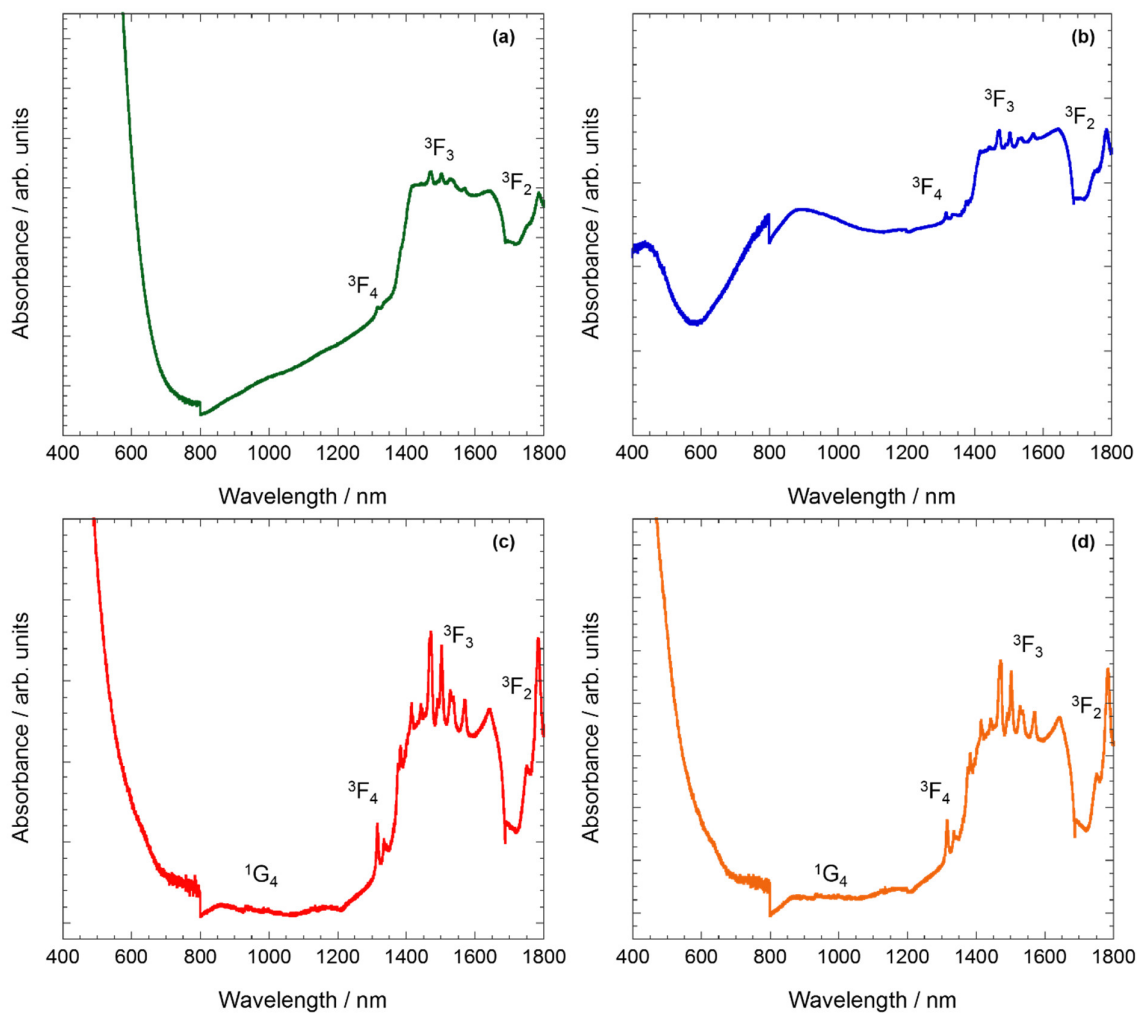

**Figure S4.** Absorption spectra of  $\text{Y}_2\text{O}_3:\text{Pr}^{3+}$  NCs obtained by (a) combustion method after calcination at 900 °C for 4 h; (b) molten salt method at 500 °C followed by 10 washing cycles; (c) homogeneous precipitation using urea (0.832 mol) and  $\text{H}_2\text{O}$  (200 mL) during 2 h reaction followed by calcination at 800 °C (3 h); and (d) solvothermal method at 220 °C followed by calcination at 1000 °C for 4 h.

#### 4. Thermogravimetric Analysis (TG + DSC)

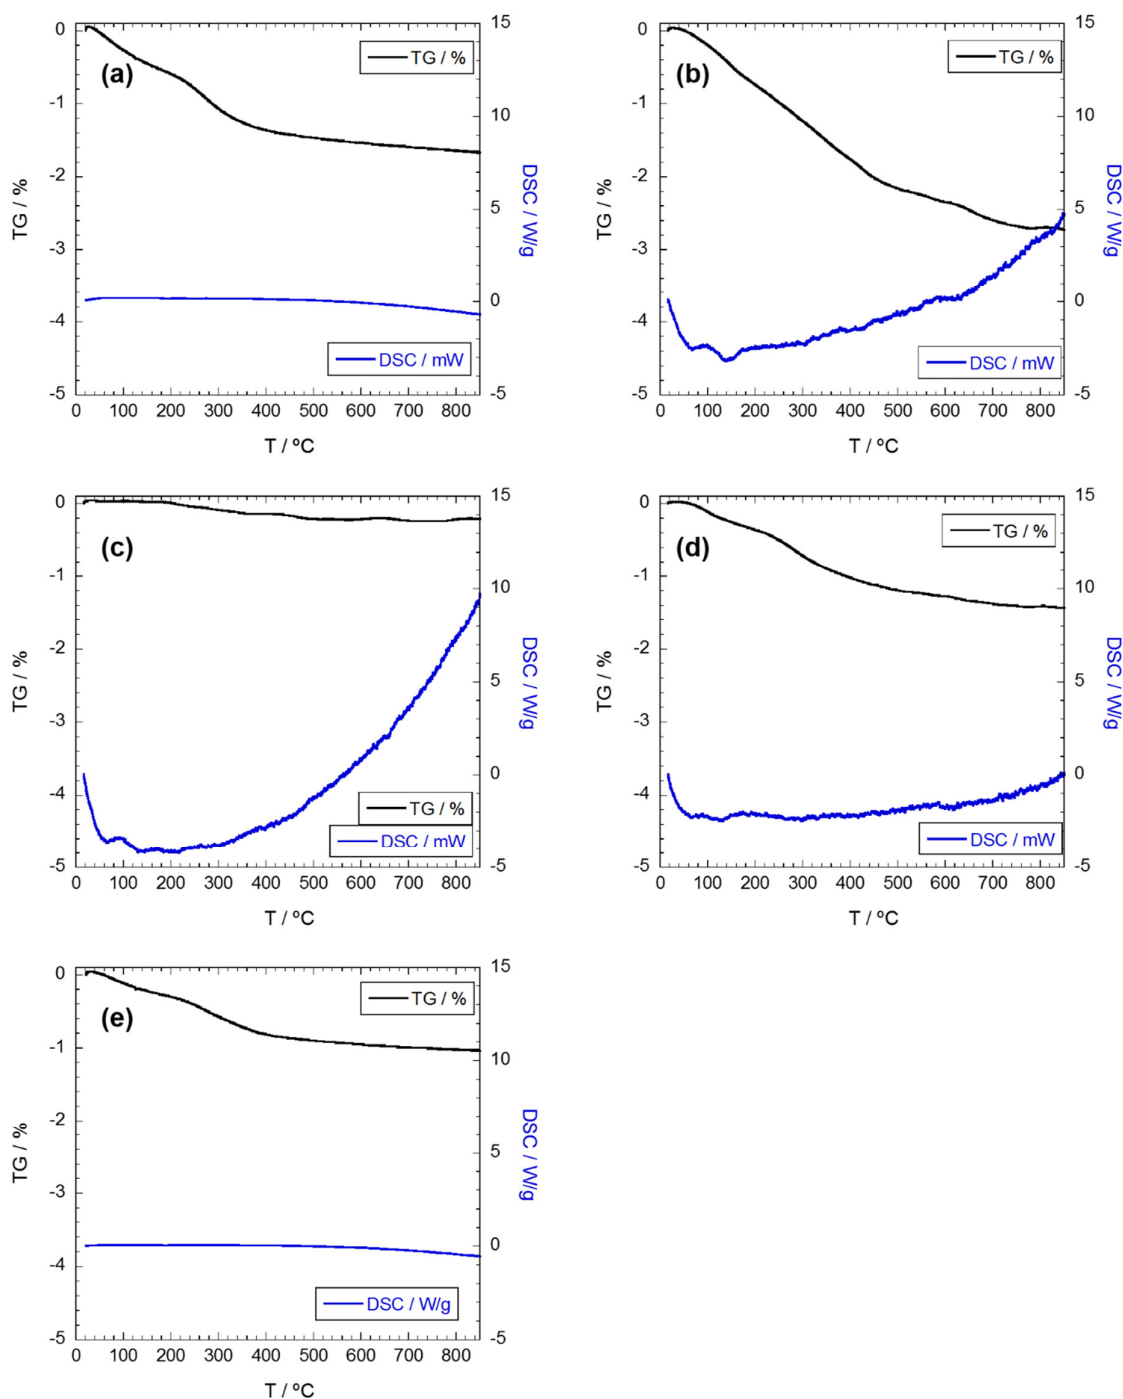

**Figure S5.** TG + DSC plots of  $\text{Y}_2\text{O}_3: \text{Pr}^{3+}$  NCs prepared by (a) combustion method after calcination at 900 °C for 4h; (b) molten salt method at 500 °C followed by 10 washing cycles; (c) sol-gel Pechini method using citric acid as chelating agent and followed by thermal treatment at 900 °C for 16 h; (d) homogeneous precipitation method using 0.832 mol of urea and 200 ml of water during 2 h reaction followed by thermal treatment at 800 °C for 3 h; and (e) solvothermal method at 220 °C followed by calcination at 1000 °C for 4 h.

## 5. Transmission Electron Microscopy (TEM) Images

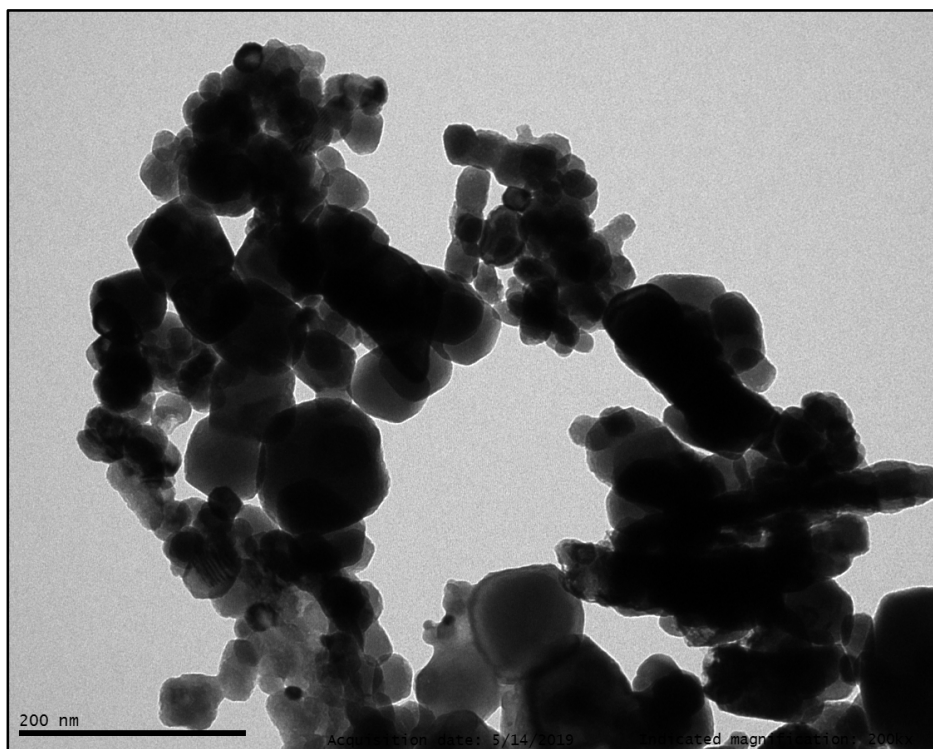

**Figure S6.** TEM images of  $\text{Y}_2\text{O}_3: \text{Pr}^{3+}$  NCs obtained by molten salt method at 500 °C followed by 10 washing cycles.

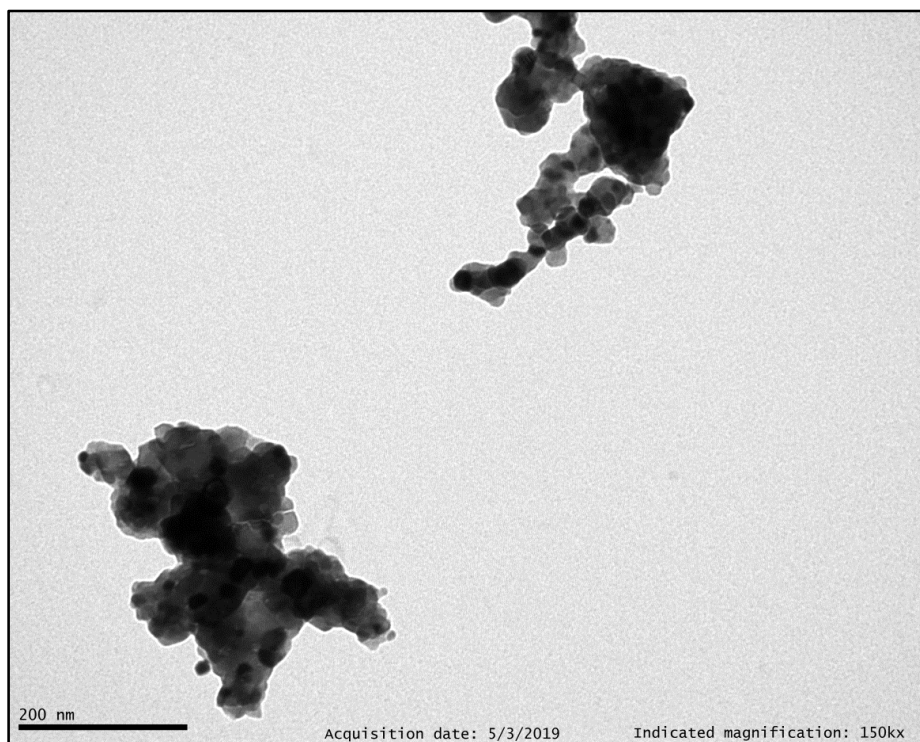

**Figure S7.** TEM image of  $\text{Y}_2\text{O}_3: \text{Pr}^{3+}$  NCs obtained by sol-gel Pechini method using citric acid as chelating agent and followed by thermal treatment at 800 °C for 16 h.

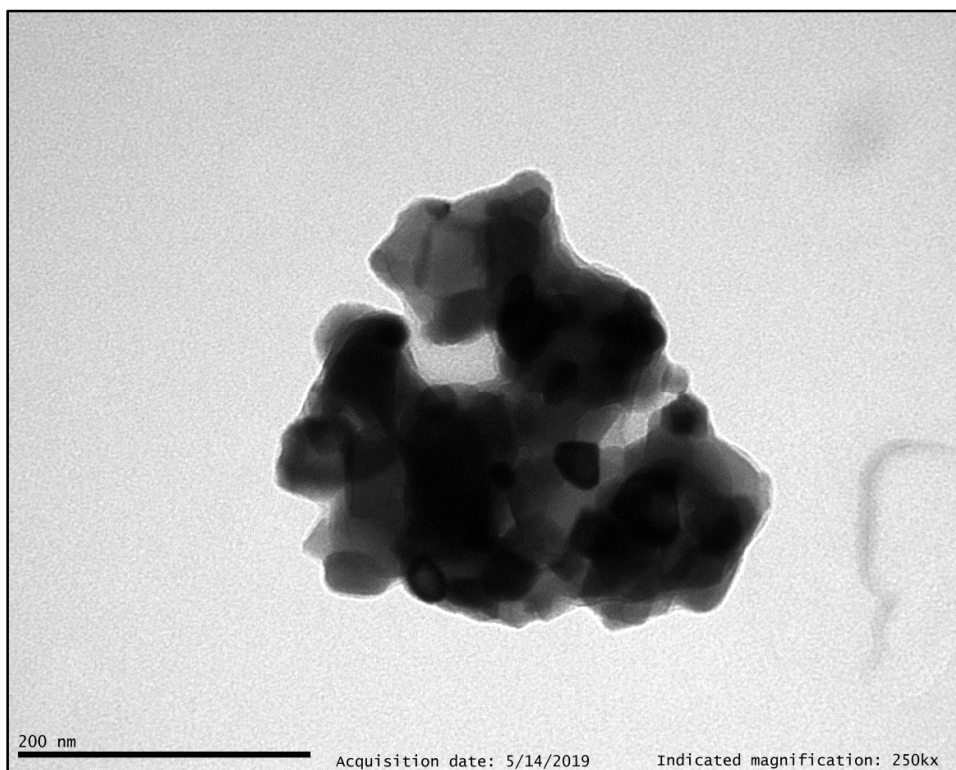

**Figure S8.** TEM image of  $\text{Y}_2\text{O}_3: \text{Pr}^{3+}$  NCs obtained by sol-gel Pechini method using citric acid as chelating agent and followed by thermal treatment at 800 °C for 24 h.

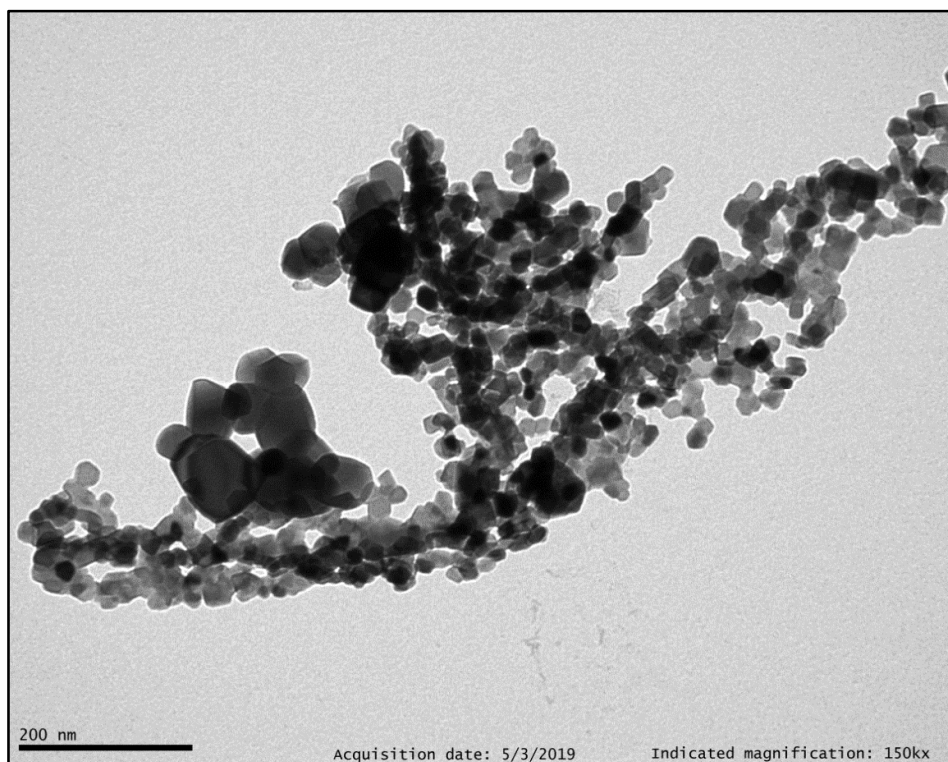

**Figures S9.** TEM images of  $\text{Y}_2\text{O}_3: \text{Pr}^{3+}$  NCs obtained by sol-gel Pechini method using citric acid as chelating agent and followed by thermal treatment at 900 °C for 16 h.

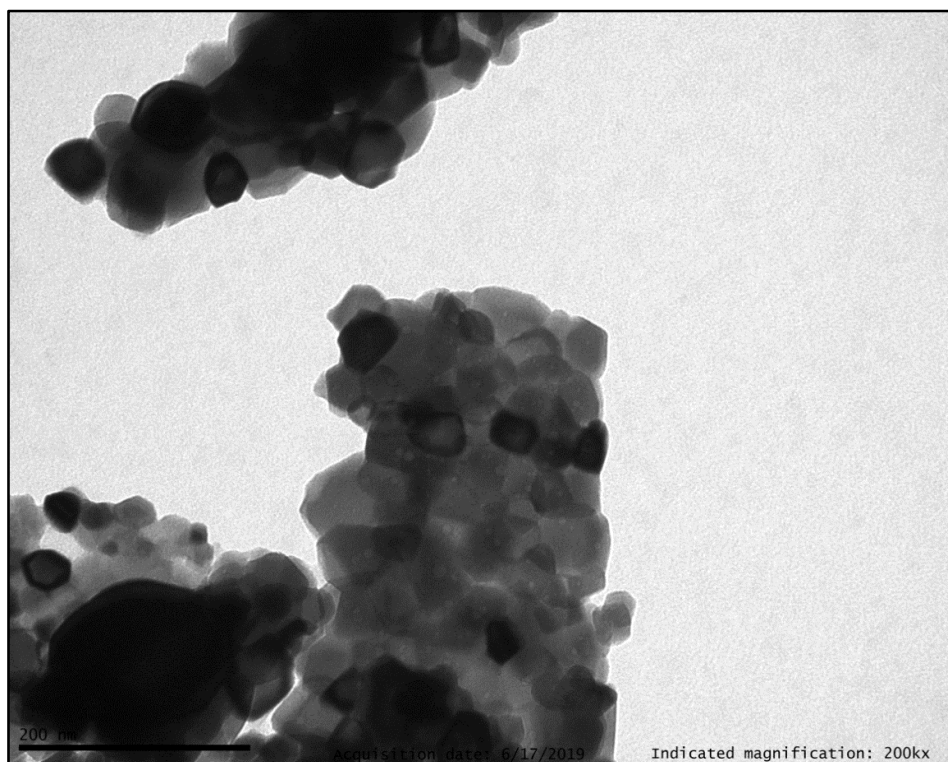

**Figure S10.** TEM image of  $\text{Y}_2\text{O}_3:\text{Pr}^{3+}$  NCs obtained by sol-gel Pechini method using EDTA as chelating agent and followed by thermal treatment at 900 °C for 16 h.

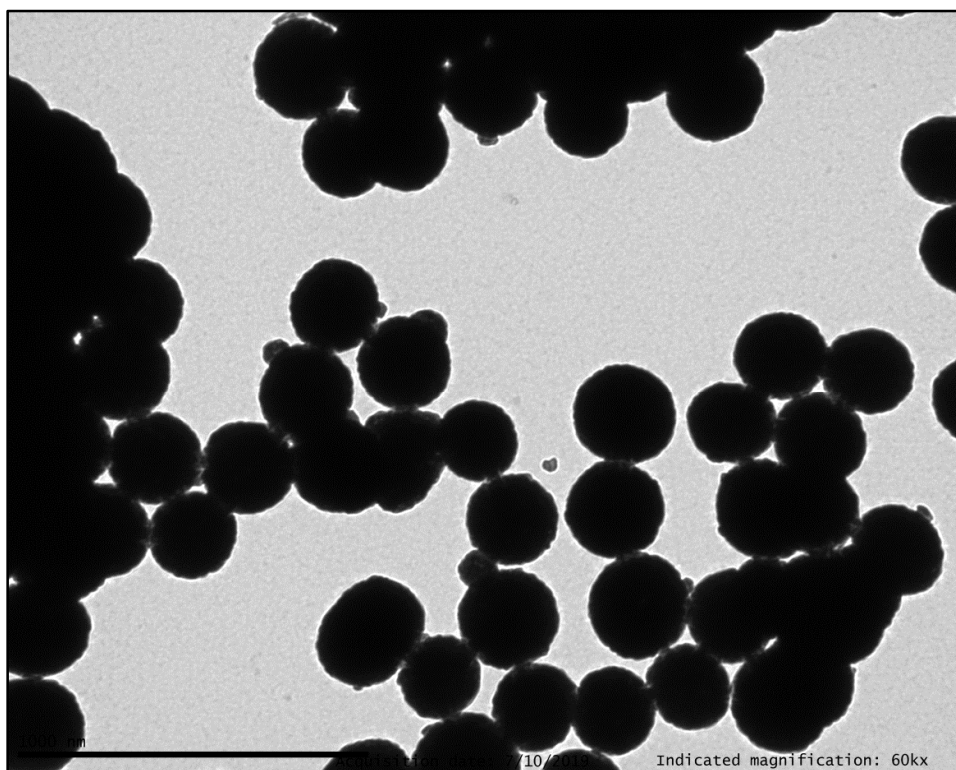

**Figure S11.** TEM image of  $\text{Y}_2\text{O}_3:\text{Pr}^{3+}$  NCs obtained by homogeneous precipitation using 0.485 mol of urea and 360 ml of water during 2 h reaction followed by thermal treatment at 800 °C for 3 h.



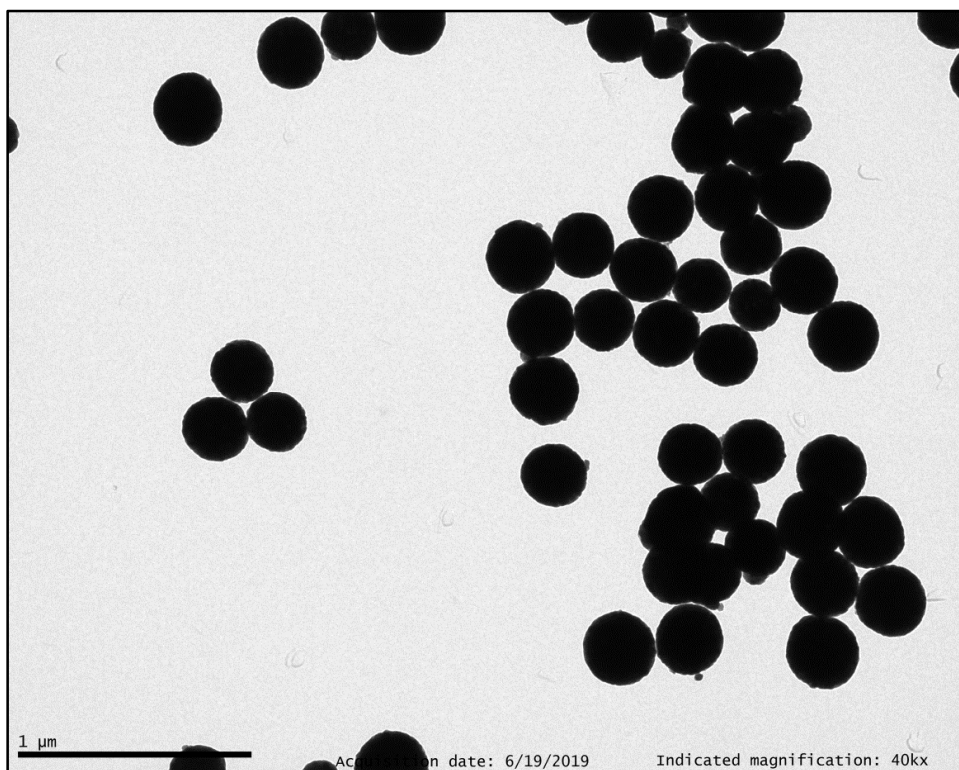

**Figure S12.** TEM image of Y<sub>2</sub>O<sub>3</sub>: Pr<sup>3+</sup> NCs obtained by homogeneous precipitation using 0.485 mol of urea and 720 ml of water during 2 h reaction followed by thermal treatment at 800 °C for 3 h.

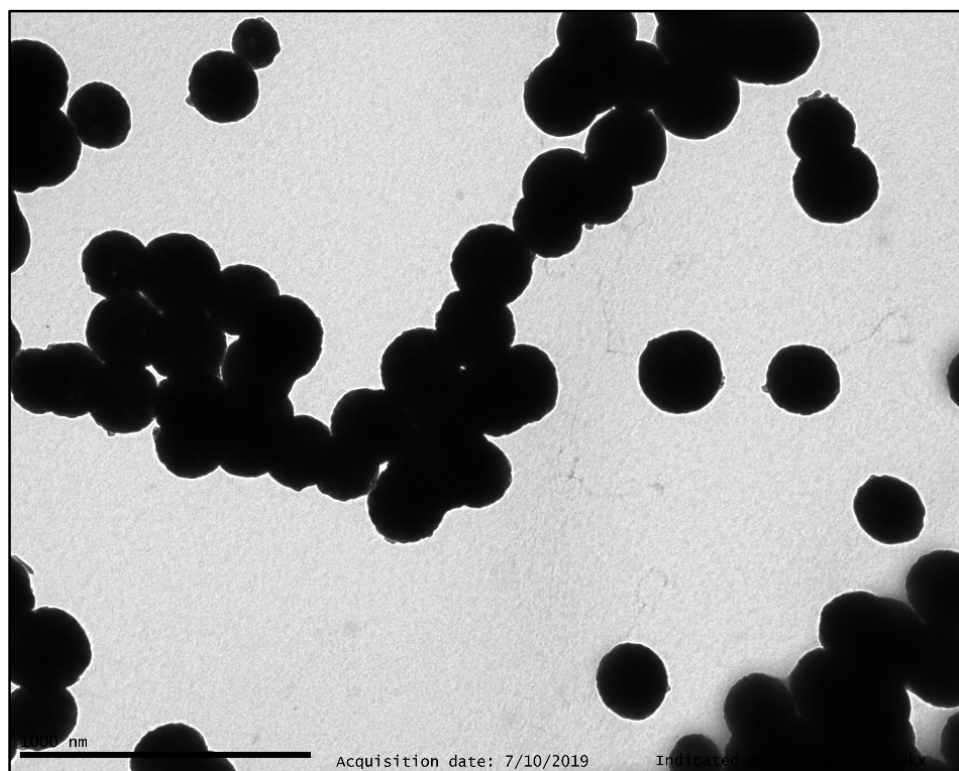

**Figure S13.** TEM image of Y<sub>2</sub>O<sub>3</sub>: Pr<sup>3+</sup> NCs obtained by homogeneous precipitation using 0.485 mol of urea and 200 ml of water during 2 h reaction followed by thermal treatment at 800 °C for 3 h.

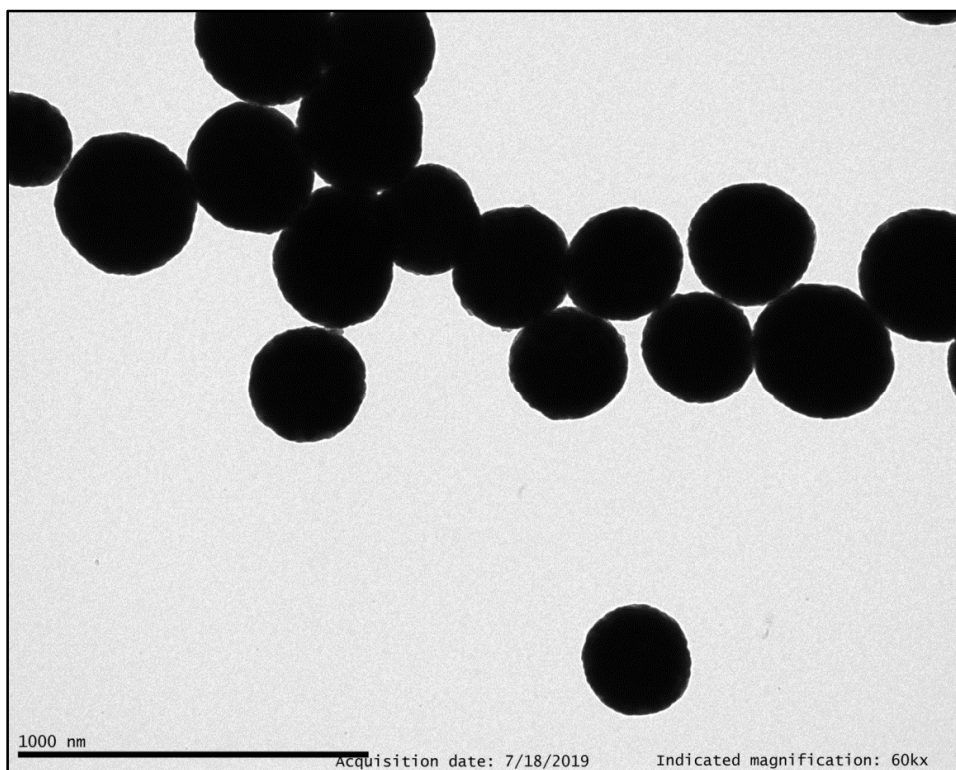

**Figure S14.** TEM image of  $\text{Y}_2\text{O}_3: \text{Pr}^{3+}$  NCs obtained by homogeneous precipitation using 0.166 mol of urea and 360 ml of water during 2 h reaction followed by thermal treatment at 800 °C for 3 h.

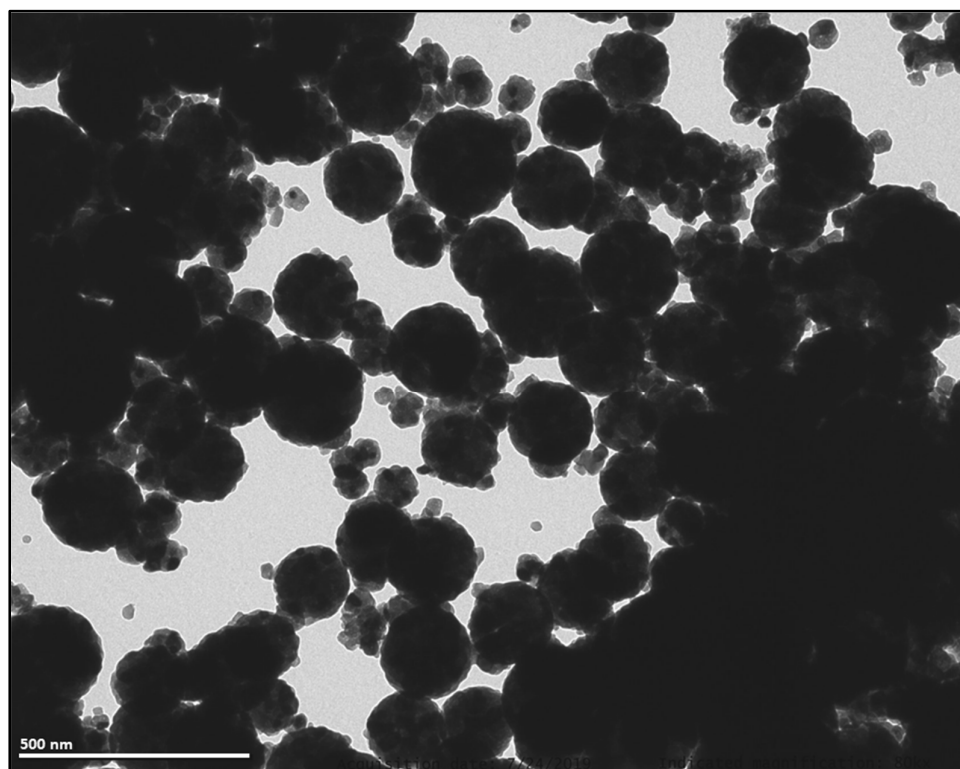

**Figure S15.** TEM image of  $\text{Y}_2\text{O}_3: \text{Pr}^{3+}$  NCs obtained by homogeneous precipitation using 1.415 mol of urea and 360 ml of water during 2 h reaction followed by thermal treatment at 800 °C for 3 h.

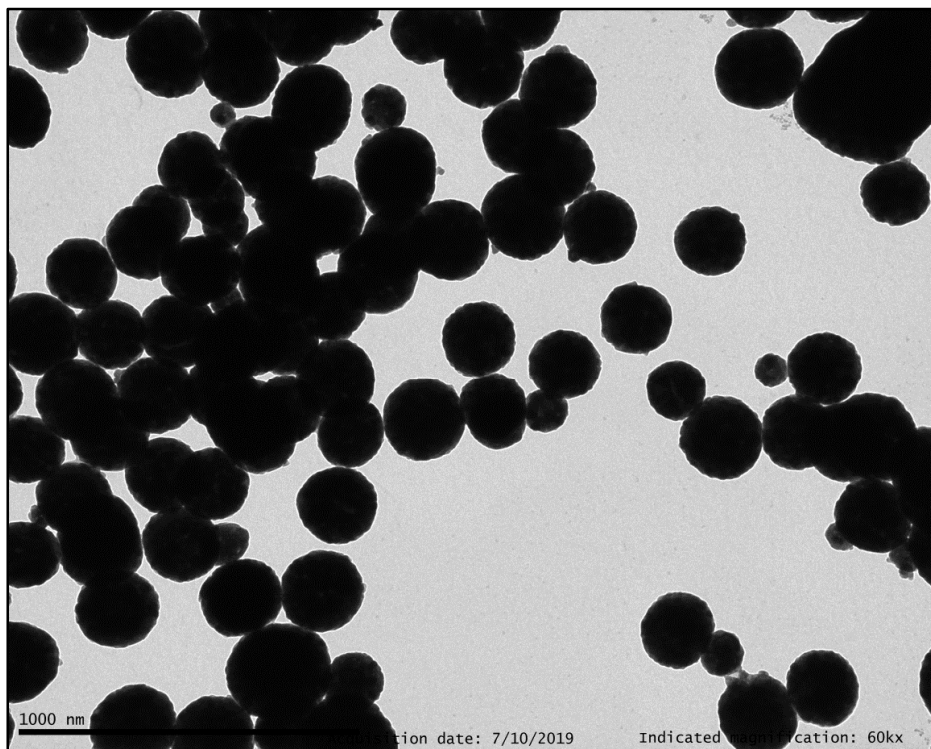

**Figure S16.** TEM image of  $\text{Y}_2\text{O}_3:\text{Pr}^{3+}$  NCs obtained by homogeneous precipitation using 0.832 mol of urea and 360 ml of water during 2 h reaction followed by thermal treatment at 800 °C for 3 h.



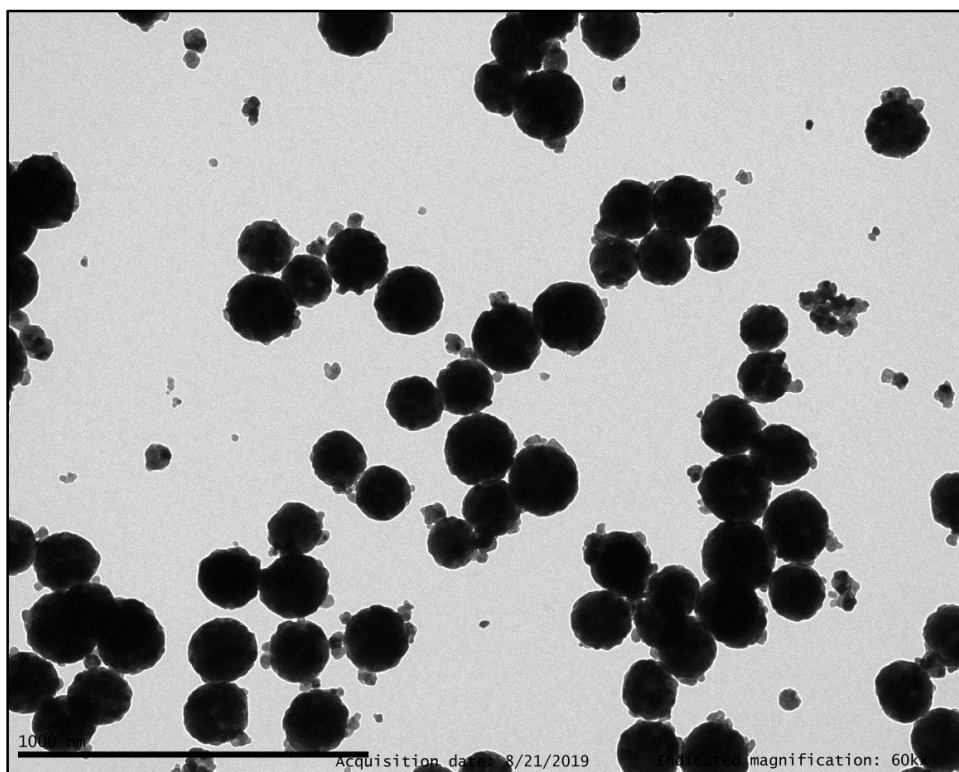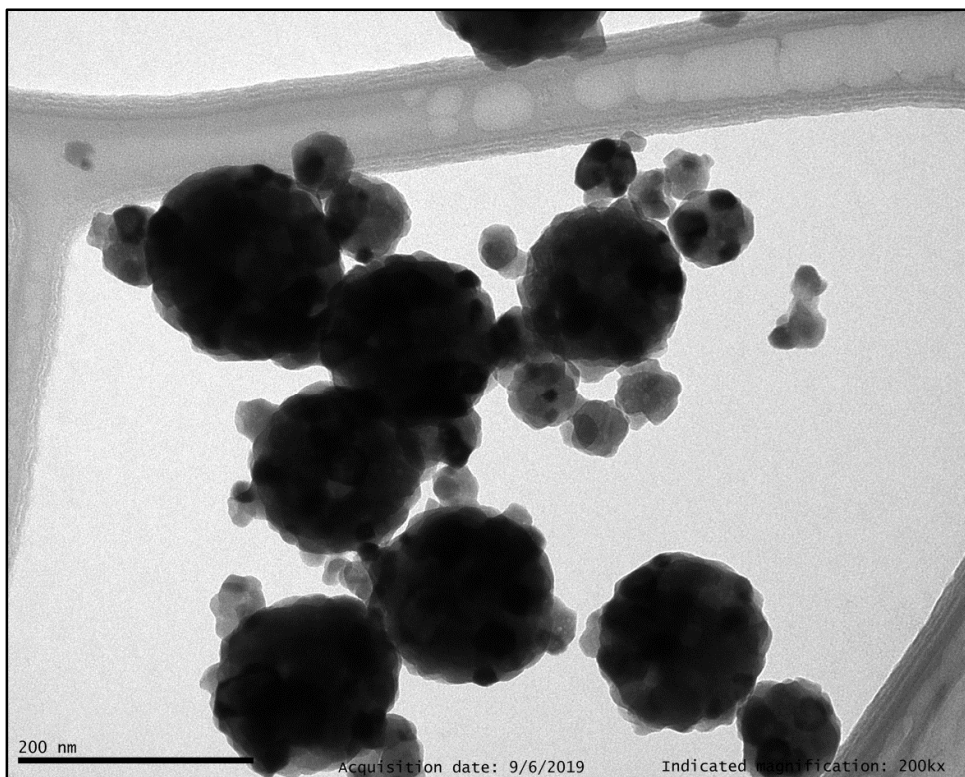

**Figures S17 and S18.** TEM images of  $\text{Y}_2\text{O}_3:\text{Pr}^{3+}$  NCs obtained by homogeneous precipitation using 0.832 mol of urea and 200 ml of water during 2 h reaction followed by thermal treatment at 800 °C for 3 h.

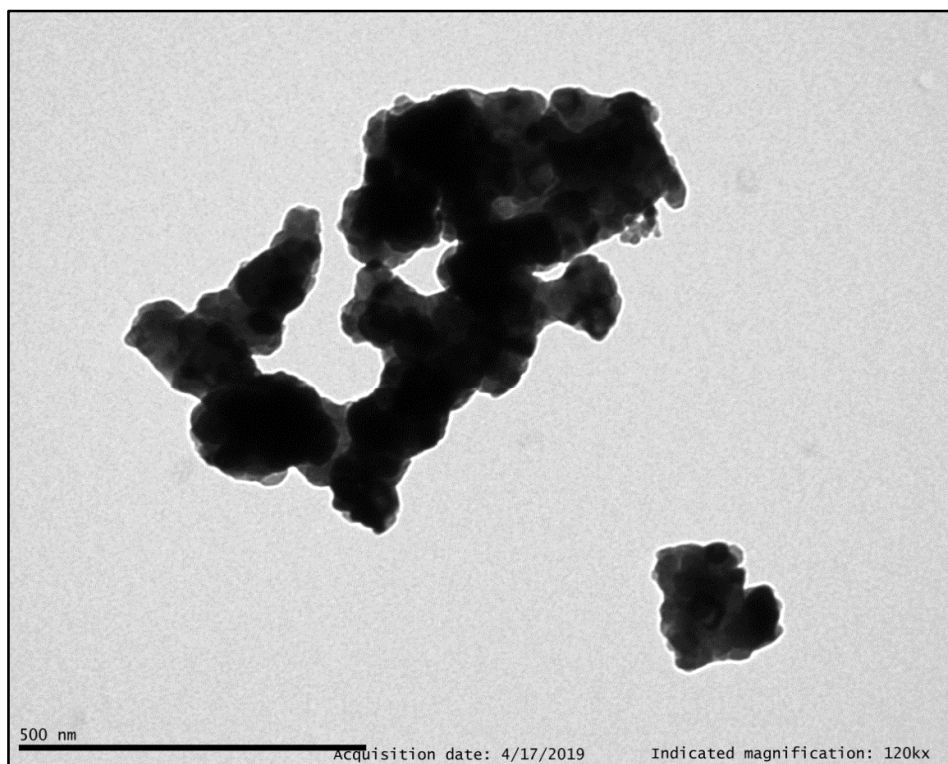

**Figure S19.** TEM image of Y<sub>2</sub>O<sub>3</sub>: Pr<sup>3+</sup> NCs prepared by solvothermal method at 180 °C for 24 h followed by calcination at 800 °C for 4 h.

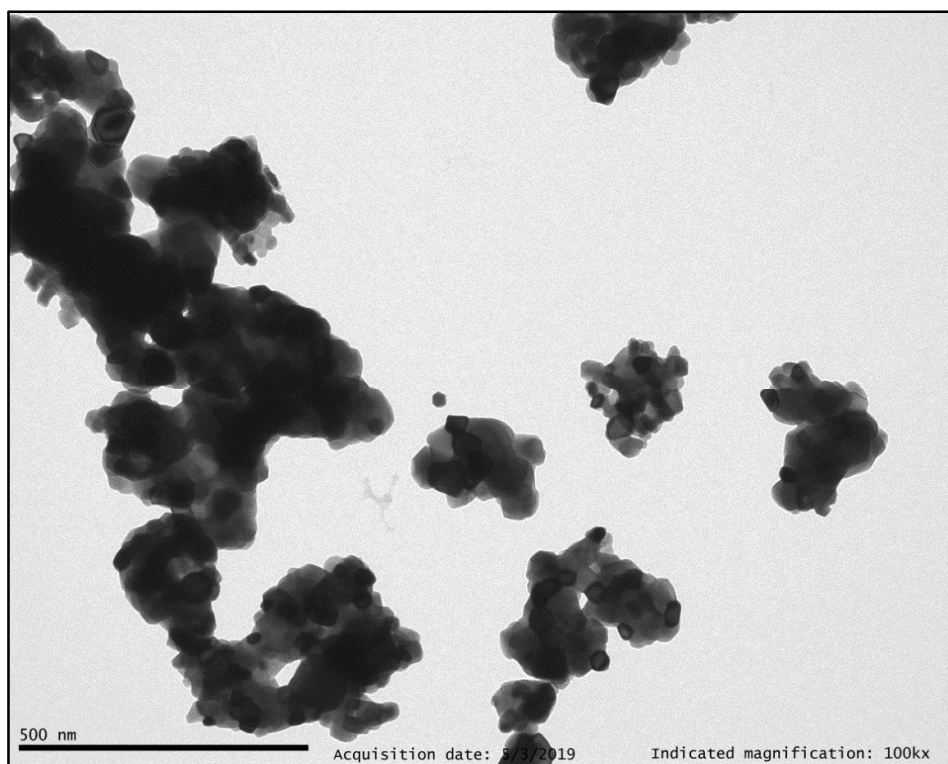

**Figure S20.** TEM image of Y<sub>2</sub>O<sub>3</sub>: Pr<sup>3+</sup> NCs prepared by solvothermal method at 180 °C for 24 h followed by calcination at 900 °C for 4 h.

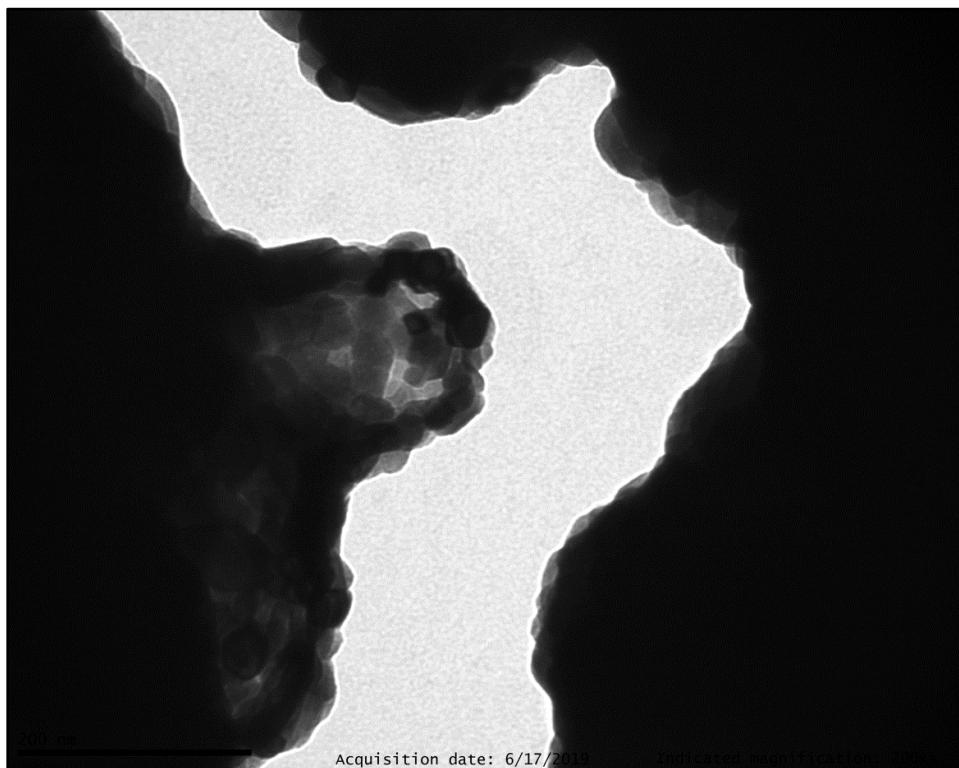

**Figure S21.** TEM image of  $\text{Y}_2\text{O}_3:\text{Pr}^{3+}$  NCs prepared by solvothermal method at 180 °C for 24 h using a two-fold RE precursor concentration, followed by calcination at 900 °C for 4 h.

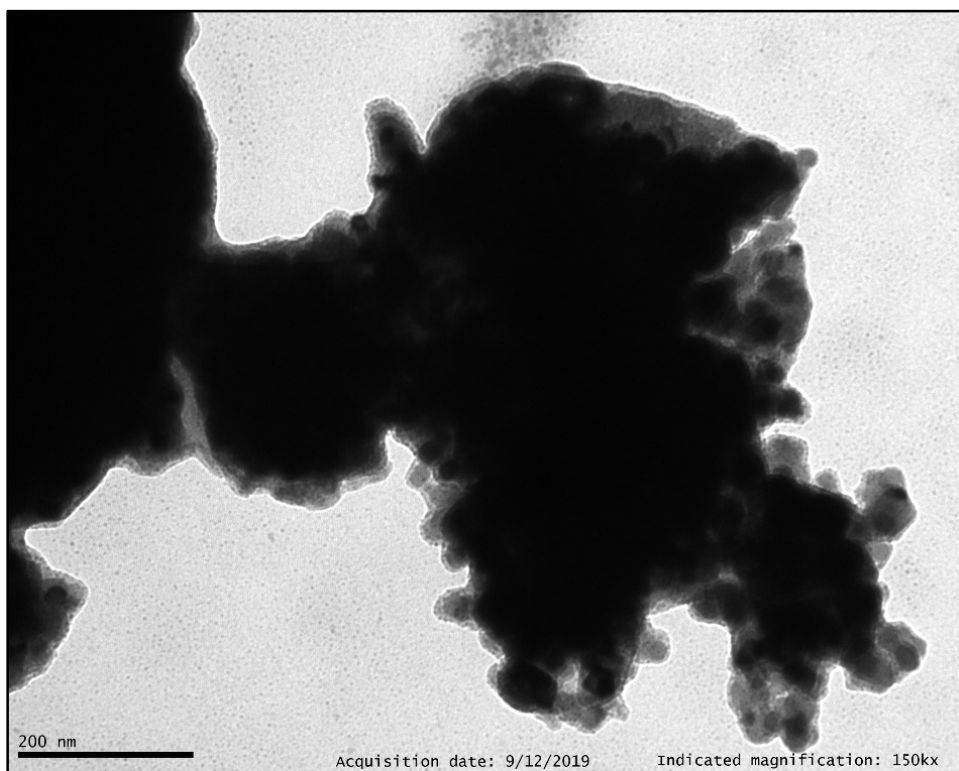

**Figure S22.** TEM image of  $\text{Y}_2\text{O}_3:\text{Pr}^{3+}$  NCs prepared by solvothermal method at 180 °C for 24 h using EtOH, followed by calcination at 900 °C for 4 h.

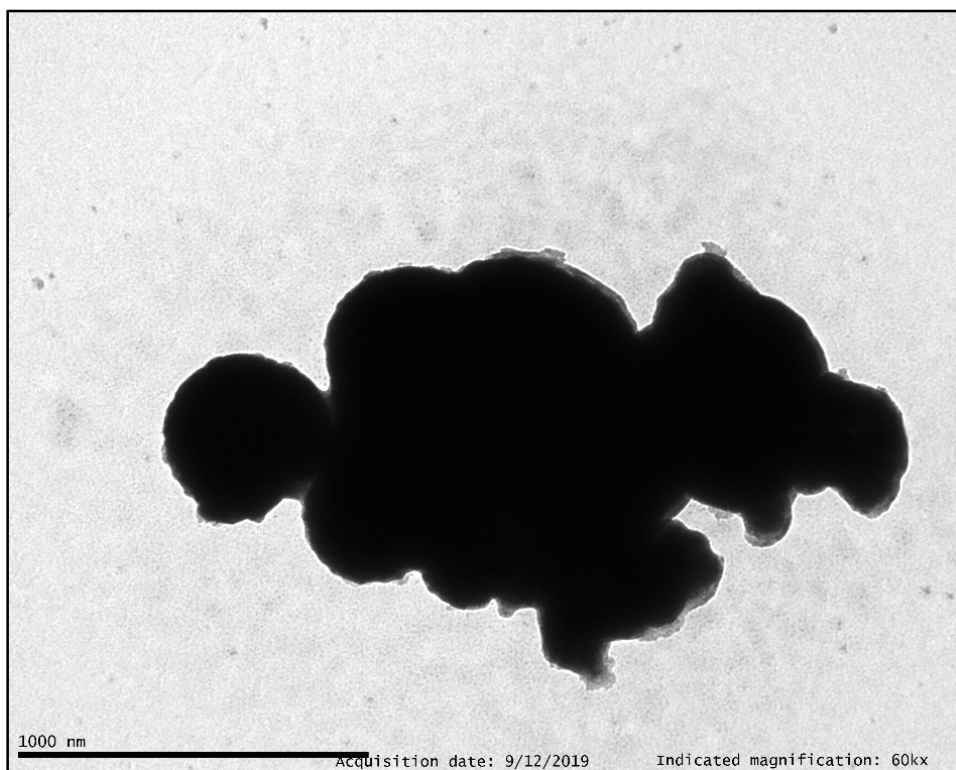

**Figure S23.** TEM image of  $\text{Y}_2\text{O}_3: \text{Pr}^{3+}$  NCs prepared by solvothermal method at 180 °C for 24 h followed by calcination at 900 °C for 8 h.

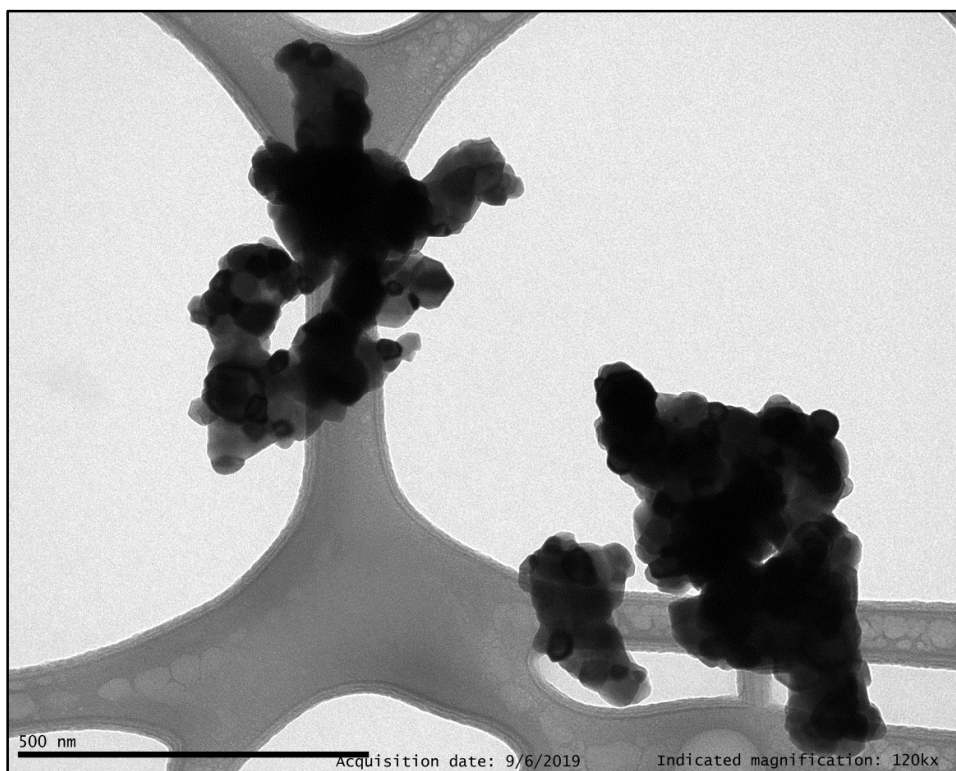

**Figure S24.** TEM image of  $\text{Y}_2\text{O}_3: \text{Pr}^{3+}$  NCs prepared by solvothermal method at 220 °C for 24 h followed by calcination at 900 °C for 4 h.

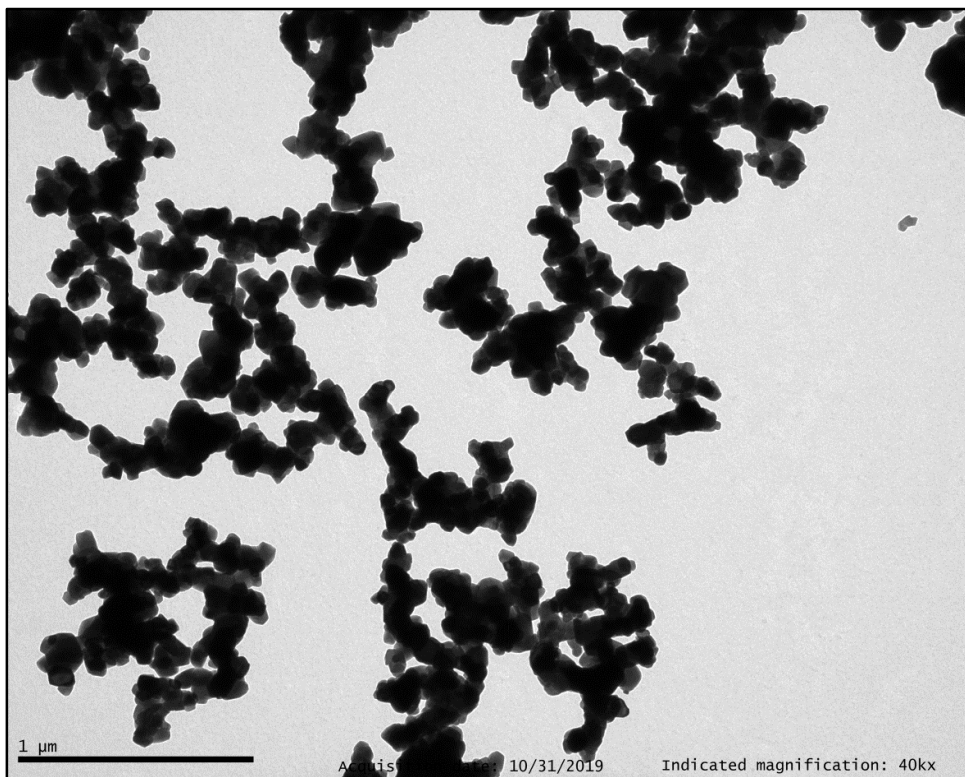

**Figure S25.** TEM images of  $\text{Y}_2\text{O}_3:\text{Pr}^{3+}$  NCs prepared by solvothermal method at 220 °C for 24 h followed by calcination at 1000 °C for 4 h.



## 6. Fluorescence Emission Spectroscopy

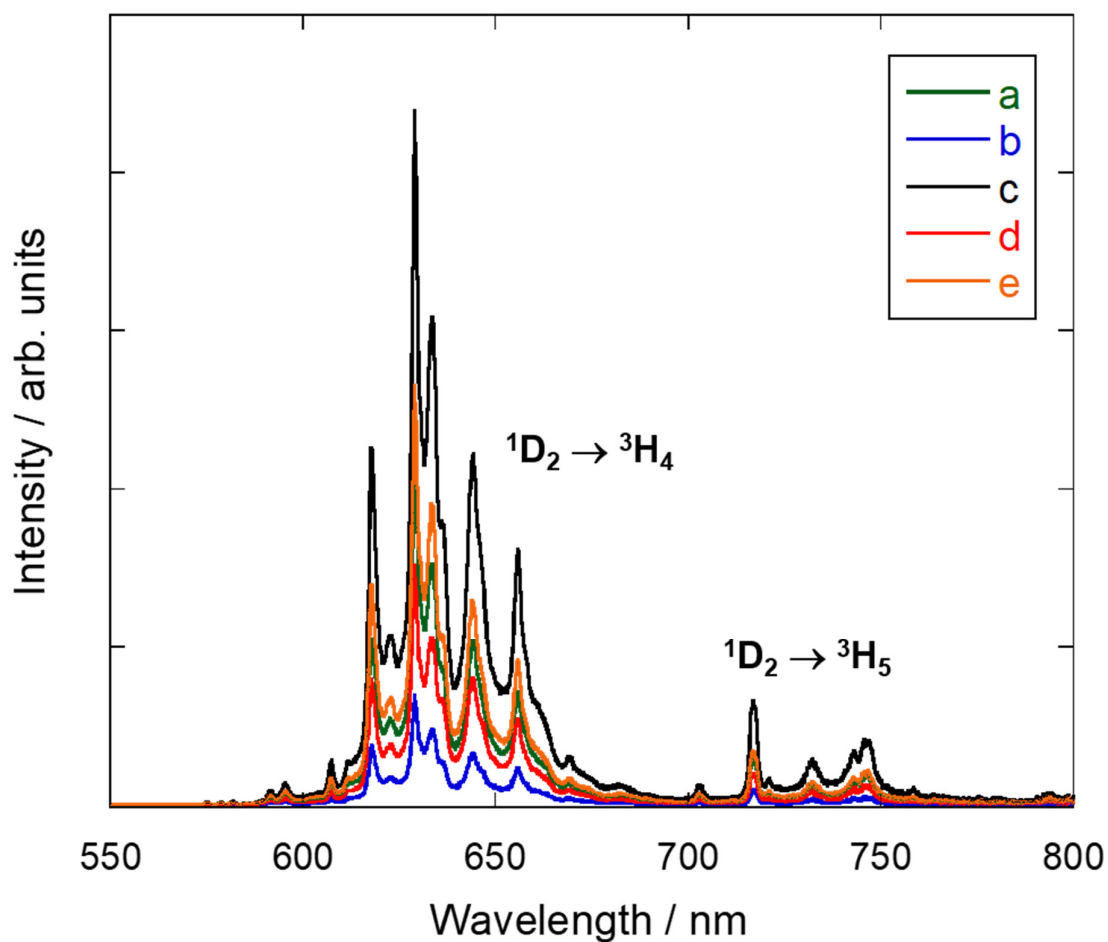

**Figure S26.** Emission spectra from C<sub>2</sub> site ( $\lambda_{\text{ex}} = 292$  nm) of Y<sub>2</sub>O<sub>3</sub>: Pr<sup>3+</sup> NCs prepared by (a) combustion method after calcination at 900 °C for 4h; (b) molten salt method at 500 °C followed by 10 washing cycles; (c) sol-gel Pechini method using citric acid as chelating agent and followed by calcination at 900 °C for 16 h; (d) homogeneous precipitation using 0.832 mol of urea and 200 ml of water during 2 h reaction followed by thermal treatment at 800 °C for 3 h; and (e) solvothermal method at 220 °C followed by calcination at 1000 °C for 4 h.

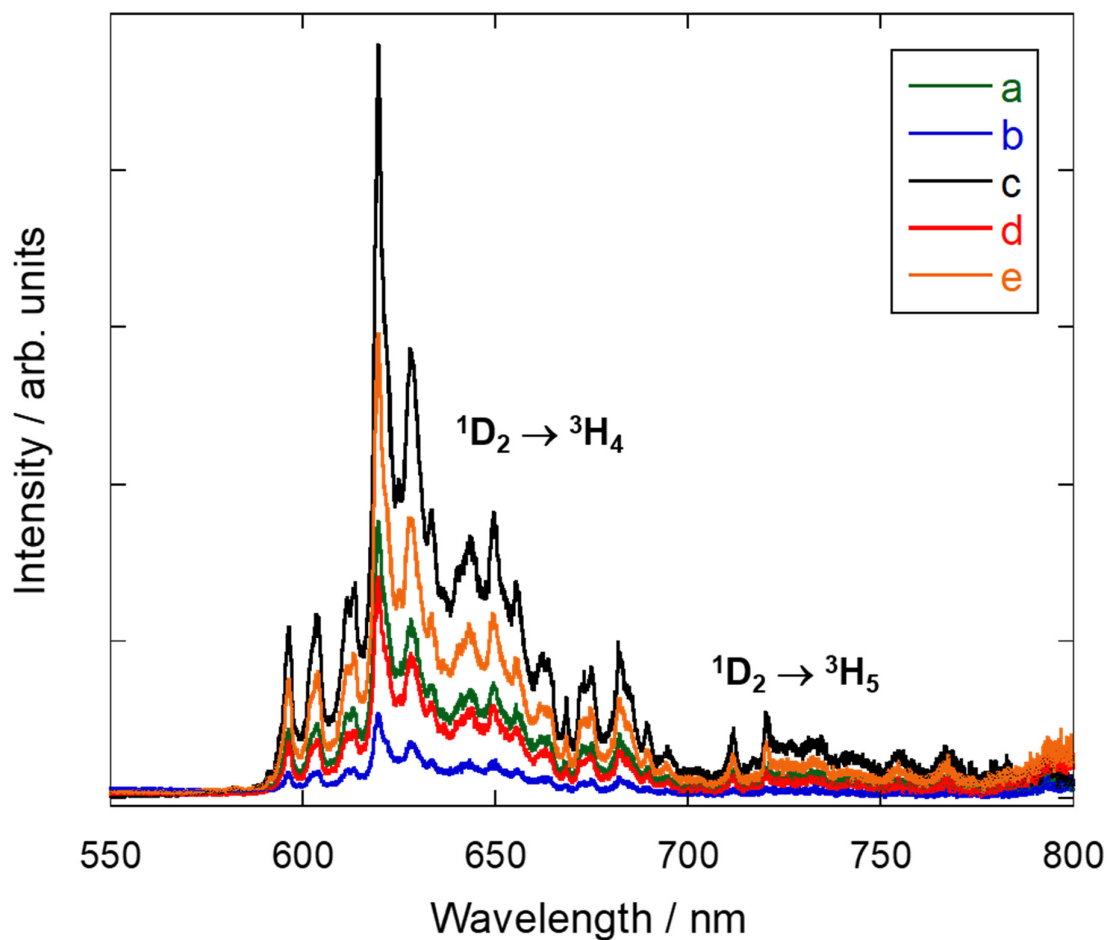

**Figure S27.** Emission spectra from  $S_6$  site ( $\lambda_{\text{ex}} = 330$  nm) of  $\text{Y}_2\text{O}_3:\text{Pr}^{3+}$  NCs prepared by (a) combustion method after calcination at  $900$  °C for 4 h; (b) molten salt method at  $500$  °C followed by 10 washing cycles; (c) sol-gel Pechini method using citric acid as chelating agent and followed by calcination at  $900$  °C for 16 h; (d) homogeneous precipitation using 0.832 mol of urea and 200 ml of water during 2 h reaction followed by thermal treatment at  $800$  °C for 3 h; and (e) solvothermal method at  $220$  °C followed by calcination at  $1000$  °C for 4 h.

## 7. Fluorescence Excitation Spectroscopy

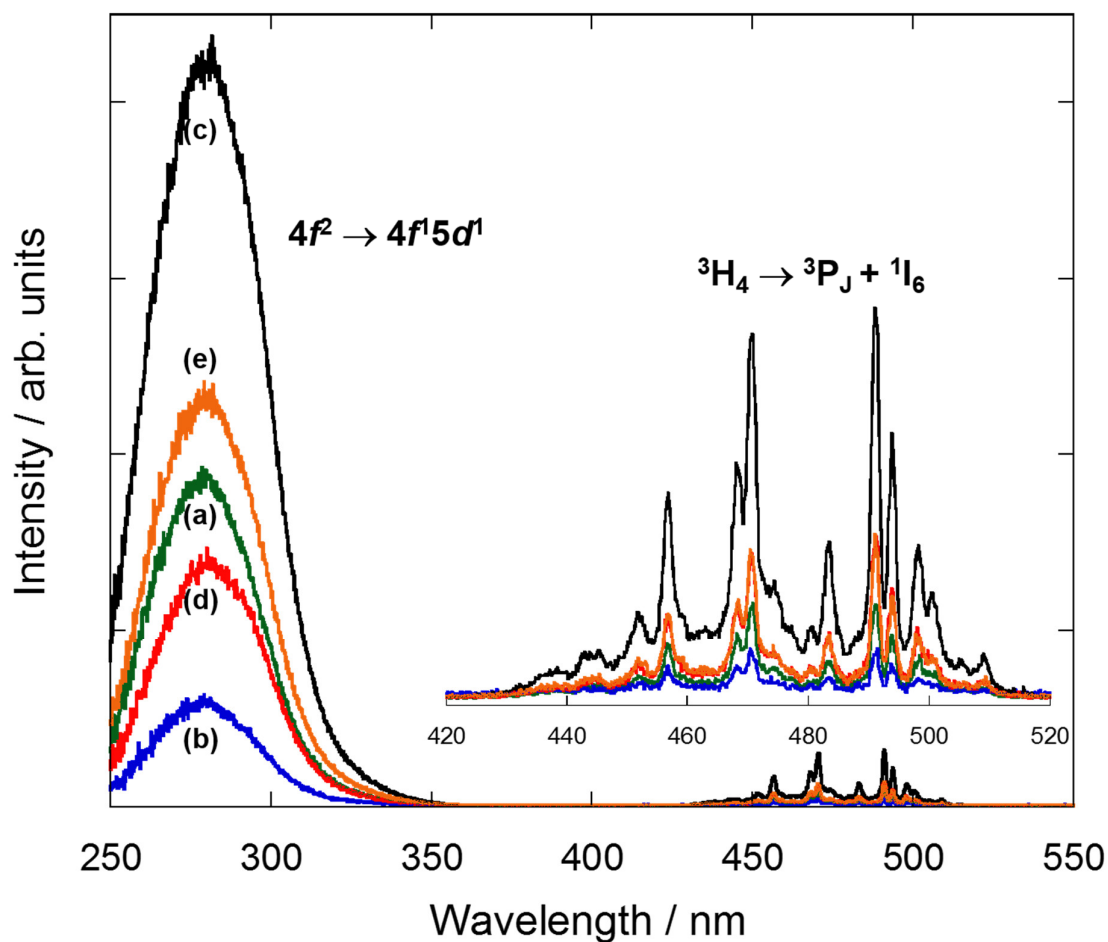

**Figure S28.** Excitation spectra at C<sub>2</sub> site ( $\lambda_{em}= 717$  nm) of Y<sub>2</sub>O<sub>3</sub>: Pr<sup>3+</sup> NCs prepared by (a) combustion method after calcination at 900 °C for 4h; (b) molten salt method at 500 °C followed by 10 washing cycles; (c) sol-gel Pechini method using citric acid as chelating agent and followed by calcination at 900 °C for 16 h; (d) homogeneous precipitation using 0.832 mol of urea and 200 ml of water during 2 h reaction followed by thermal treatment at 800 °C for 3 h; and (e) solvothermal method at 220 °C followed by calcination at 1000 °C for 4 h. The insets show a zoom of the intraconfigurational excitation transitions of Pr<sup>3+</sup> ions.



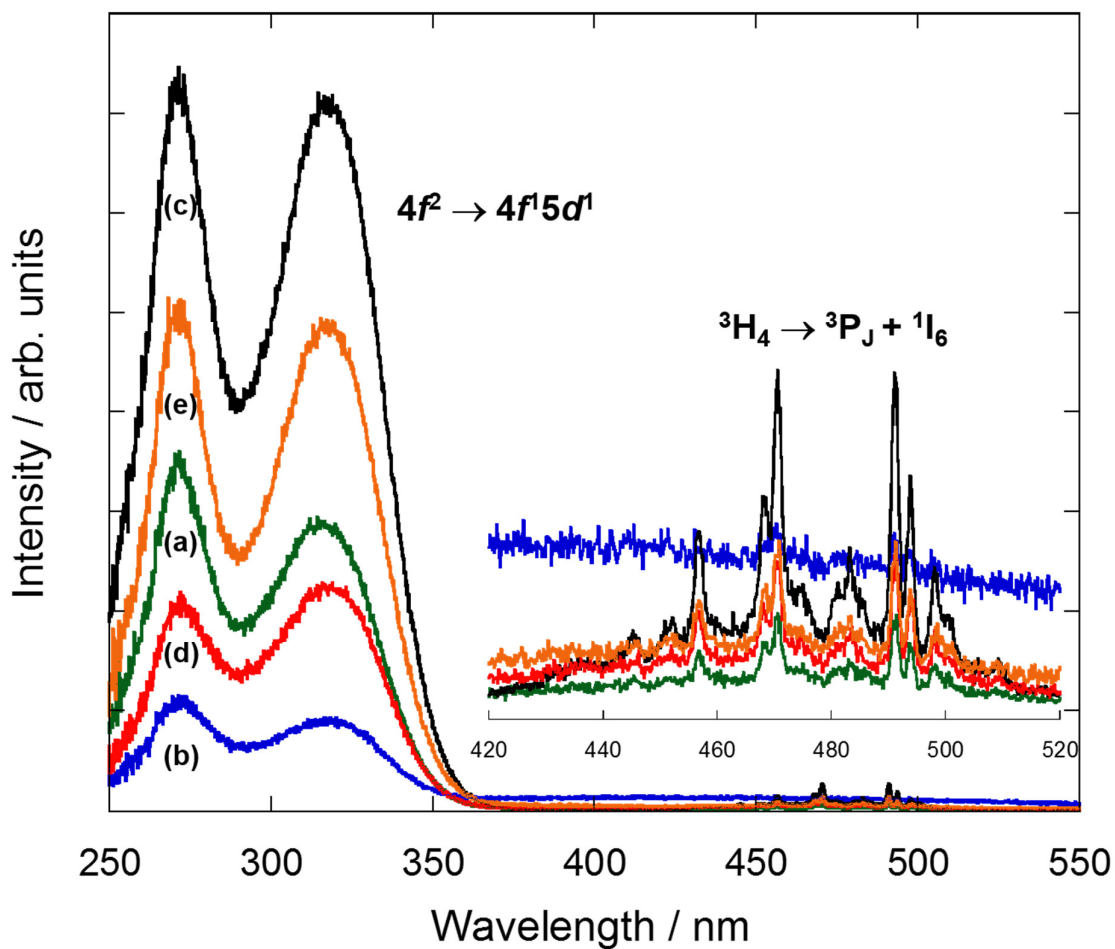

**Figure S29.** Excitation spectra at  $S_6$  site ( $\lambda_{em} = 603$  nm) of  $\text{Y}_2\text{O}_3:\text{Pr}^{3+}$  NCs prepared by (a) combustion method after calcination at  $900$  °C for 4 h; (b) molten salt method at  $500$  °C followed by 10 washing cycles; (c) sol-gel Pechini method using citric acid as chelating agent and followed by calcination at  $900$  °C for 16 h; (d) homogeneous precipitation using  $0.832$  mol of urea and  $200$  ml of water during 2 h reaction followed by thermal treatment at  $800$  °C for 3 h; and (e) solvothermal method at  $220$  °C followed by calcination at  $1000$  °C for 4 h. The insets show a zoom of the intraconfigurational excitation transitions of  $\text{Pr}^{3+}$  ions.

## 8. Luminescence Lifetime ( $\tau$ )

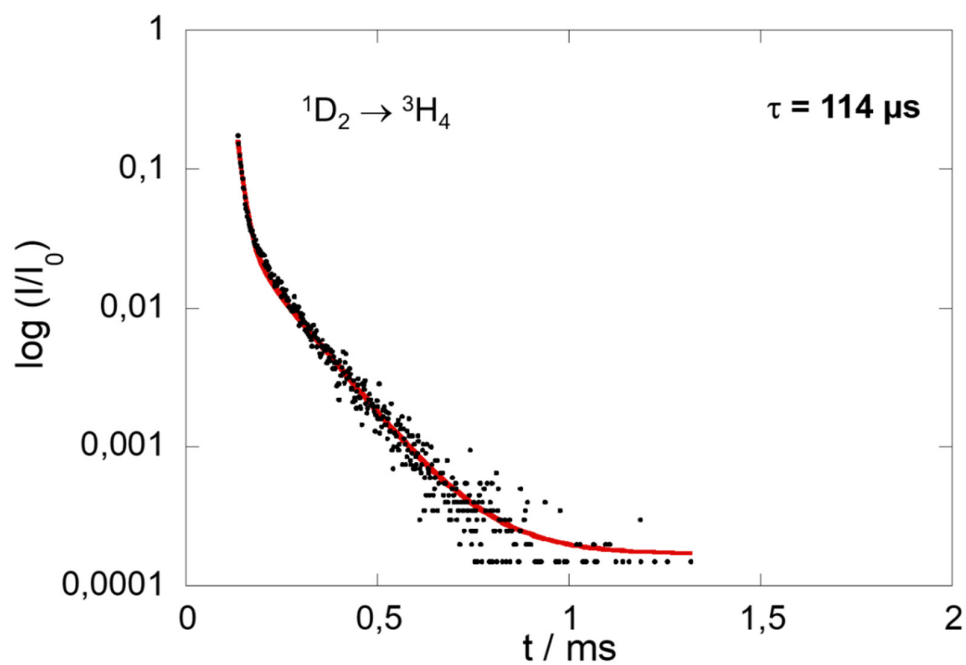

**Figure S30.** Luminescence decay curve of the  $Pr^{3+} {}^1D_2 \rightarrow {}^3H_4$  emission of  $Y_2O_3: Pr^{3+}$  NCs prepared by combustion method before calcination at  $900^\circ C$ .

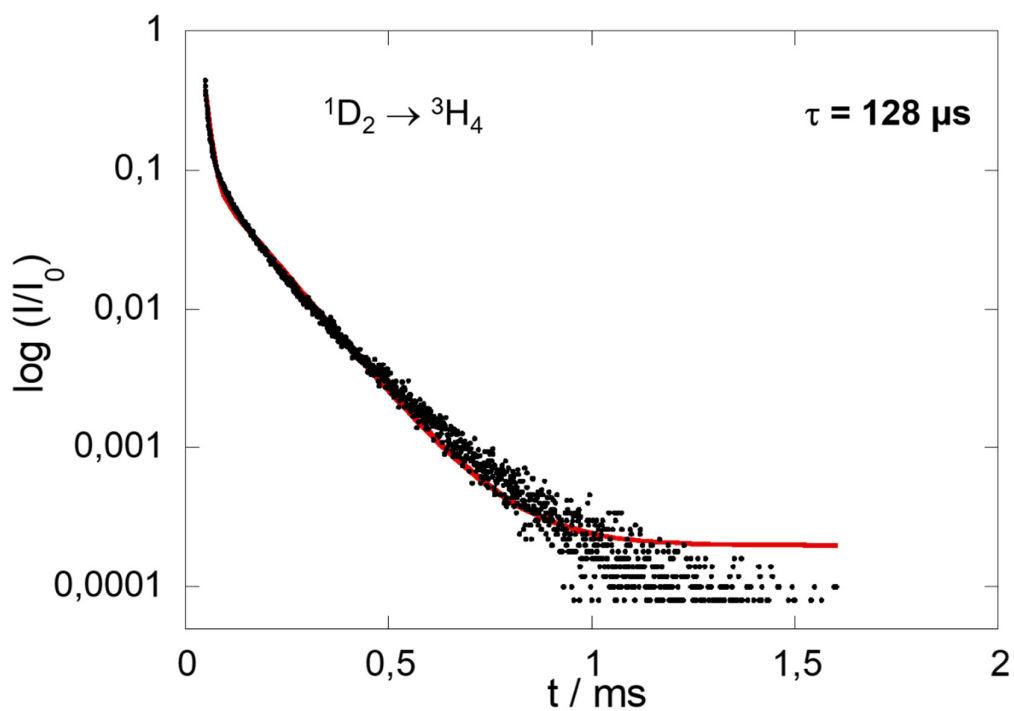

**Figure S31.** Luminescence decay curve of the  $Pr^{3+} {}^1D_2 \rightarrow {}^3H_4$  emission of  $Y_2O_3: Pr^{3+}$  NCs prepared by molten salt method at  $500^\circ C$  followed by 5 washing cycles.

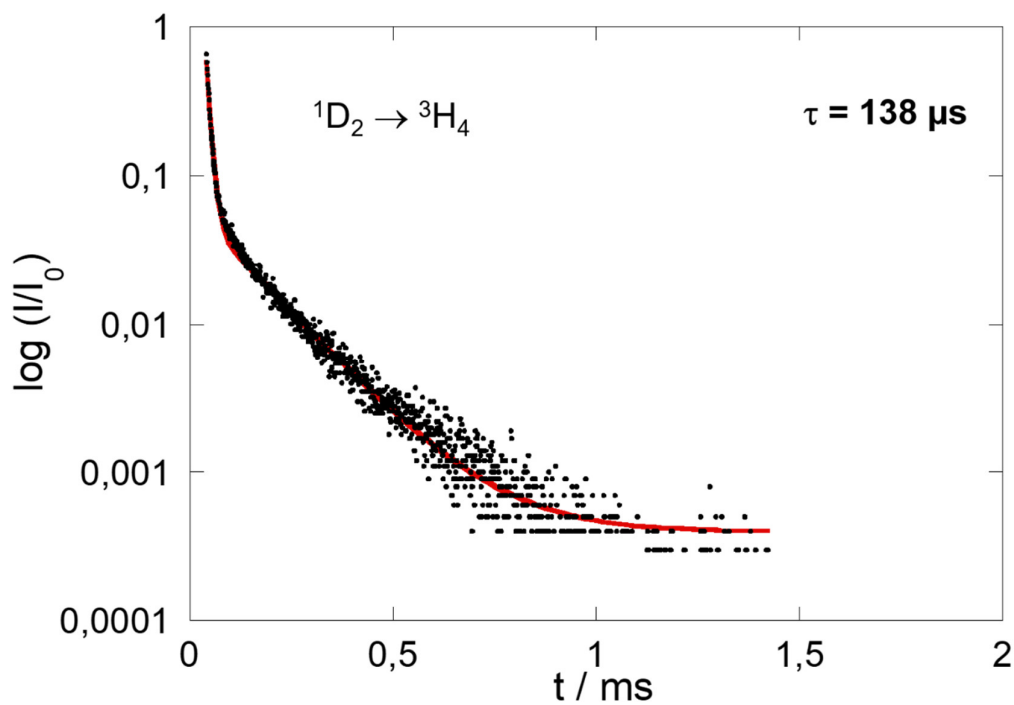

**Figure S32.** Luminescence decay curve of the  $Pr^{3+} {}^1D_2 \rightarrow {}^3H_4$  emission of  $Y_2O_3: Pr^{3+}$  NCs prepared by molten salt method at 500 °C followed by 7 washing cycles.

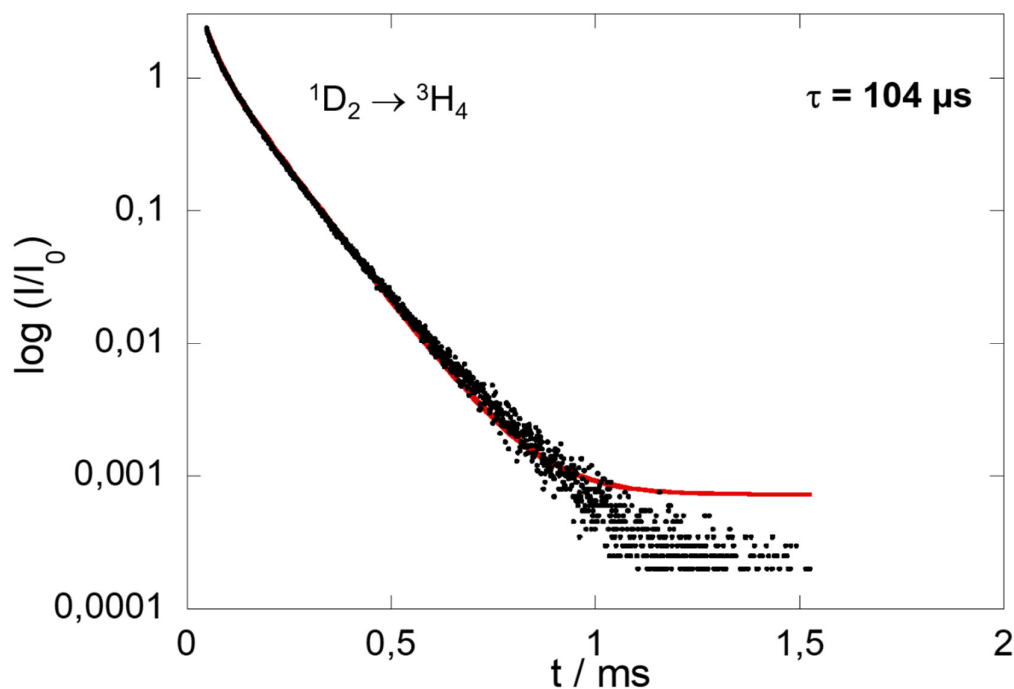

**Figure S33.** Luminescence decay curve of  $Pr^{3+} {}^1D_2 \rightarrow {}^3H_4$  emission of  $Y_2O_3: Pr^{3+}$  NCs prepared by sol-gel Pechini method using citric acid as chelating agent and followed by calcination at 800 °C for 16 h.

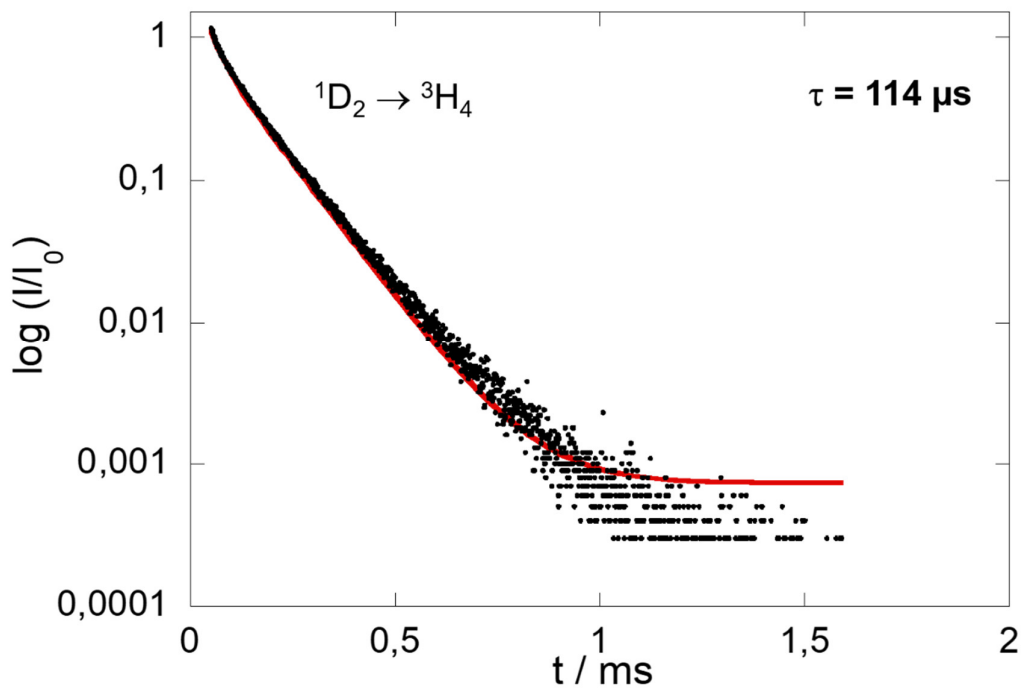

**Figure S34.** Luminescence decay curve of  $\text{Pr}^{3+} {}^1D_2 \rightarrow {}^3H_4$  emission of  $\text{Y}_2\text{O}_3: \text{Pr}^{3+}$  NCs prepared by sol-gel Pechini method using citric acid as chelating agent and followed by calcination at 800 °C for 24 h.

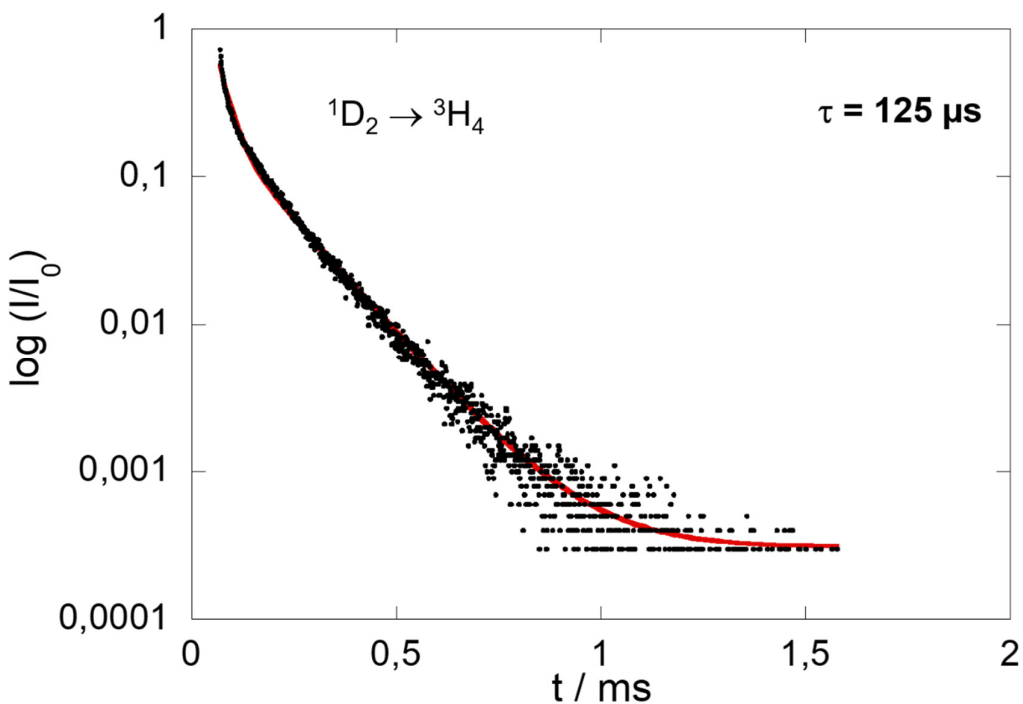

**Figure S35.** Luminescence decay curve of  $\text{Pr}^{3+} {}^1D_2 \rightarrow {}^3H_4$  emission of  $\text{Y}_2\text{O}_3: \text{Pr}^{3+}$  NCs prepared by sol-gel Pechini method using EDTA as chelating agent and followed by calcination at 900 °C for 16 h.

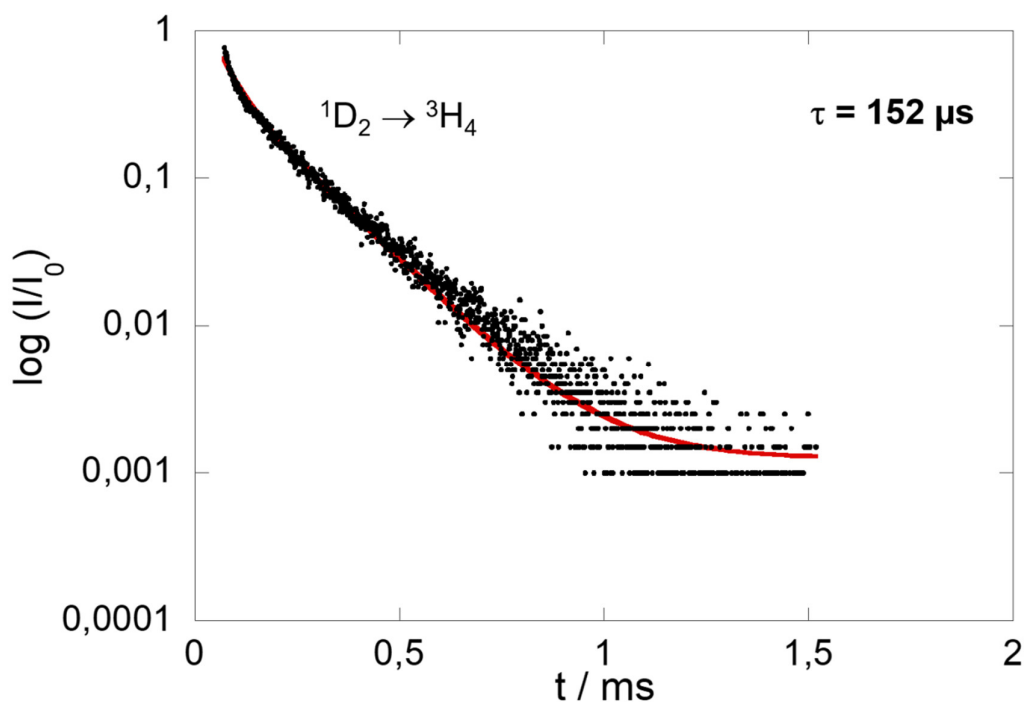

**Figure S36.** Luminescence decay curve of the  $\text{Pr}^{3+} {}^1\text{D}_2 \rightarrow {}^3\text{H}_4$  emission of  $\text{Y}_2\text{O}_3:\text{Pr}^{3+}$  NCs prepared by homogeneous precipitation method using 0.485 mol of urea and 360 ml of water during 2 h reaction followed by thermal treatment at 800 °C for 3 h.

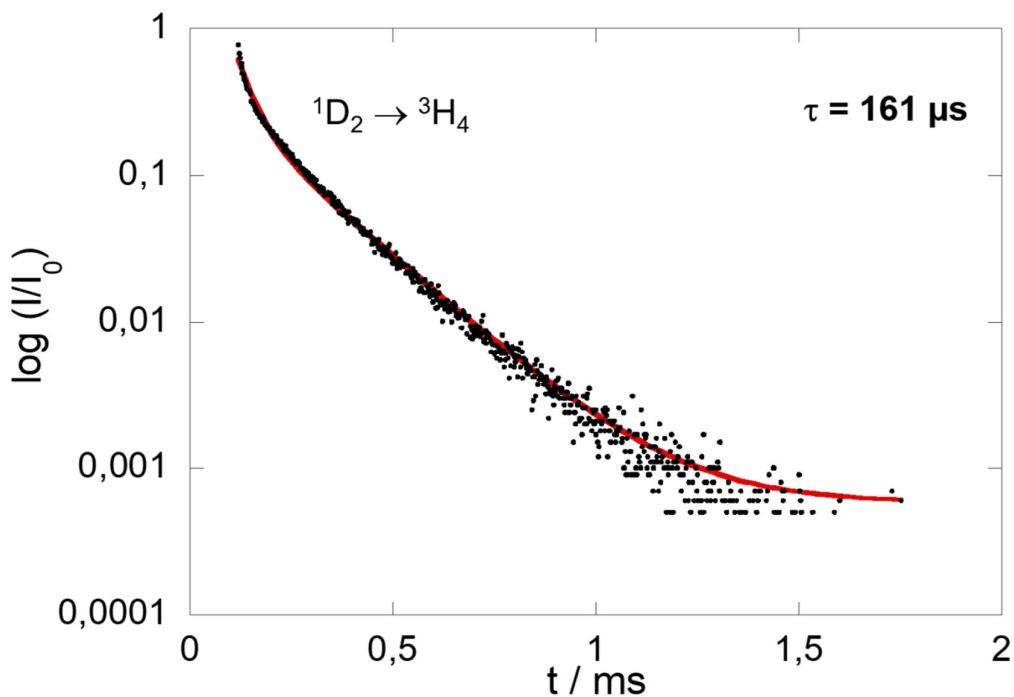

**Figure S37.** Luminescence decay curve of the  $\text{Pr}^{3+} {}^1\text{D}_2 \rightarrow {}^3\text{H}_4$  emission of  $\text{Y}_2\text{O}_3:\text{Pr}^{3+}$  NCs prepared by homogeneous precipitation method using 0.485 mol of urea and 200 ml of water during 2 h reaction followed by thermal treatment at 800 °C for 3 h.

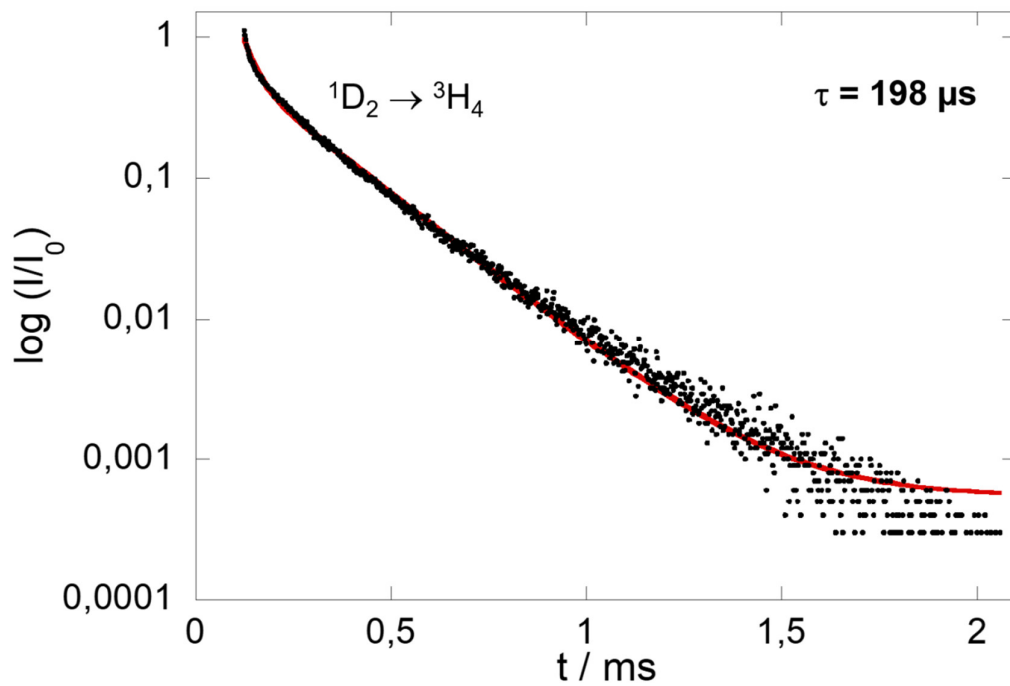

**Figure S38.** Luminescence decay curve of the  $\text{Pr}^{3+} \ ^1\text{D}_2 \rightarrow \ ^3\text{H}_4$  emission of  $\text{Y}_2\text{O}_3: \text{Pr}^{3+}$  NCs prepared by solvothermal method at 180 °C followed by calcination at 800 °C for 4 h.

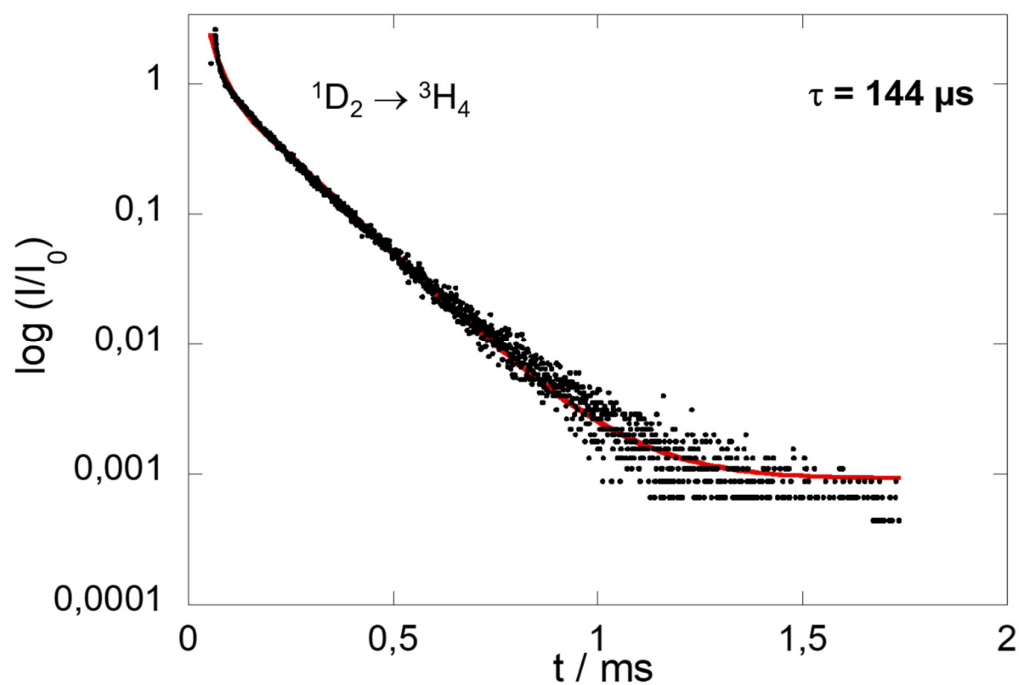

**Figure S39.** Luminescence decay curve of the  $\text{Pr}^{3+} \ ^1\text{D}_2 \rightarrow \ ^3\text{H}_4$  emission of  $\text{Y}_2\text{O}_3: \text{Pr}^{3+}$  NCs prepared by solvothermal method using 15.6957 mmol RE at 180 °C followed by calcination at 900 °C for 4 h.

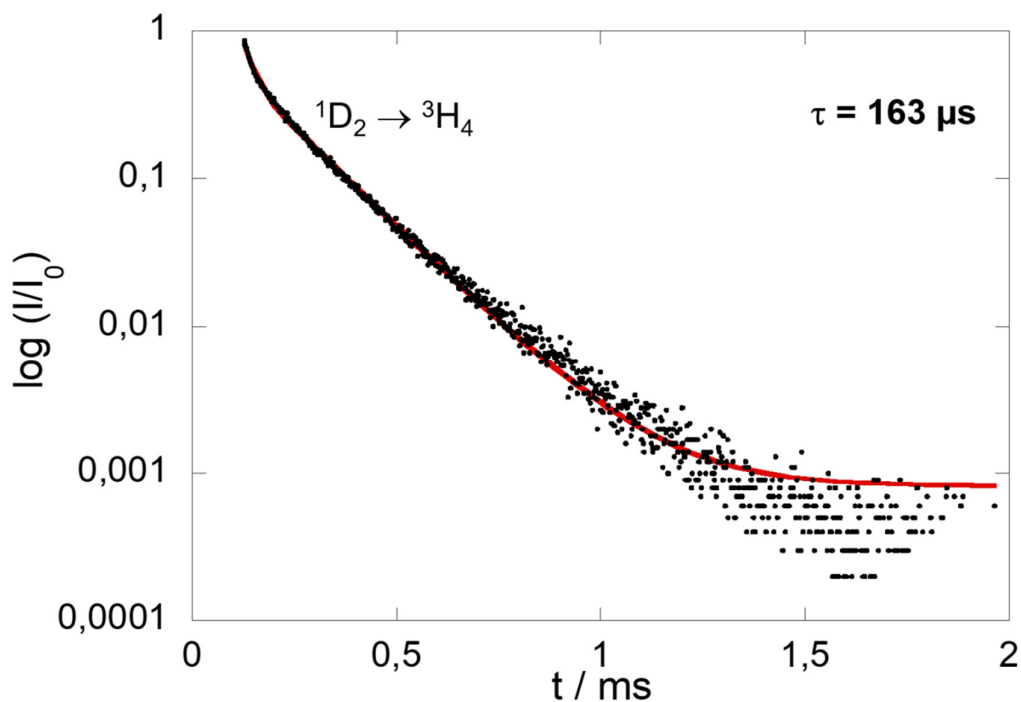

**Figure S40.** Luminescence decay curve of the  $\text{Pr}^{3+} {}^1D_2 \rightarrow {}^3H_4$  emission of  $\text{Y}_2\text{O}_3: \text{Pr}^{3+}$  NCs prepared by solvothermal method using EtOH at 180 °C followed by calcination at 900 °C for 4 h.

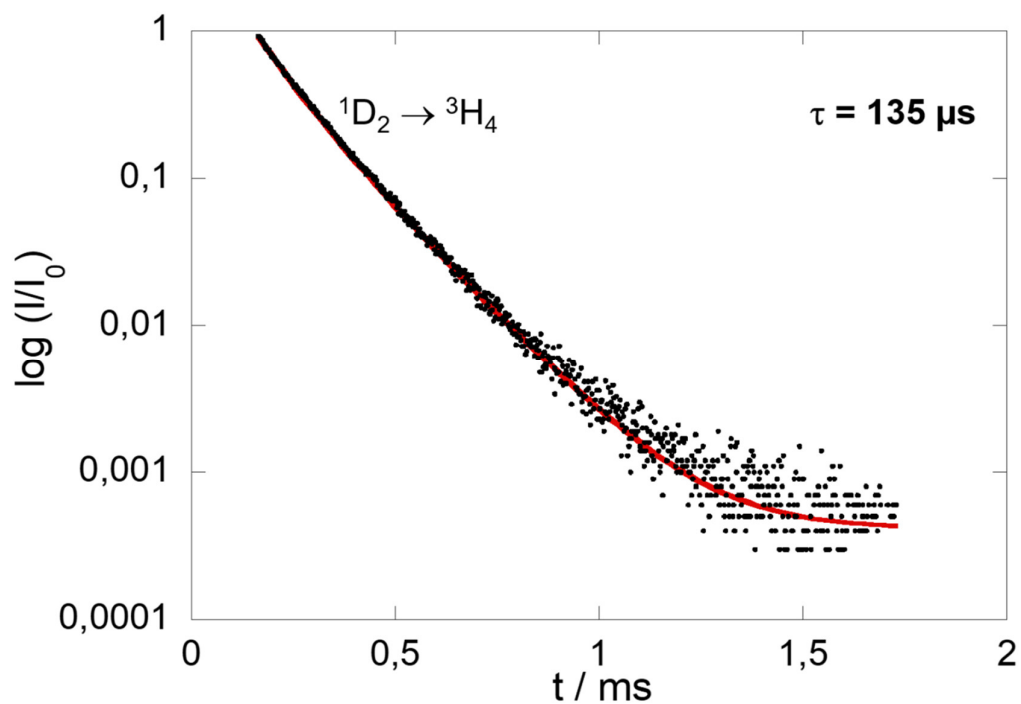

**Figure S41.** Luminescence decay curve of the  $\text{Pr}^{3+} {}^1D_2 \rightarrow {}^3H_4$  emission of  $\text{Y}_2\text{O}_3: \text{Pr}^{3+}$  NCs prepared by solvothermal method at 180 °C followed by calcination at 900 °C for 8 h.

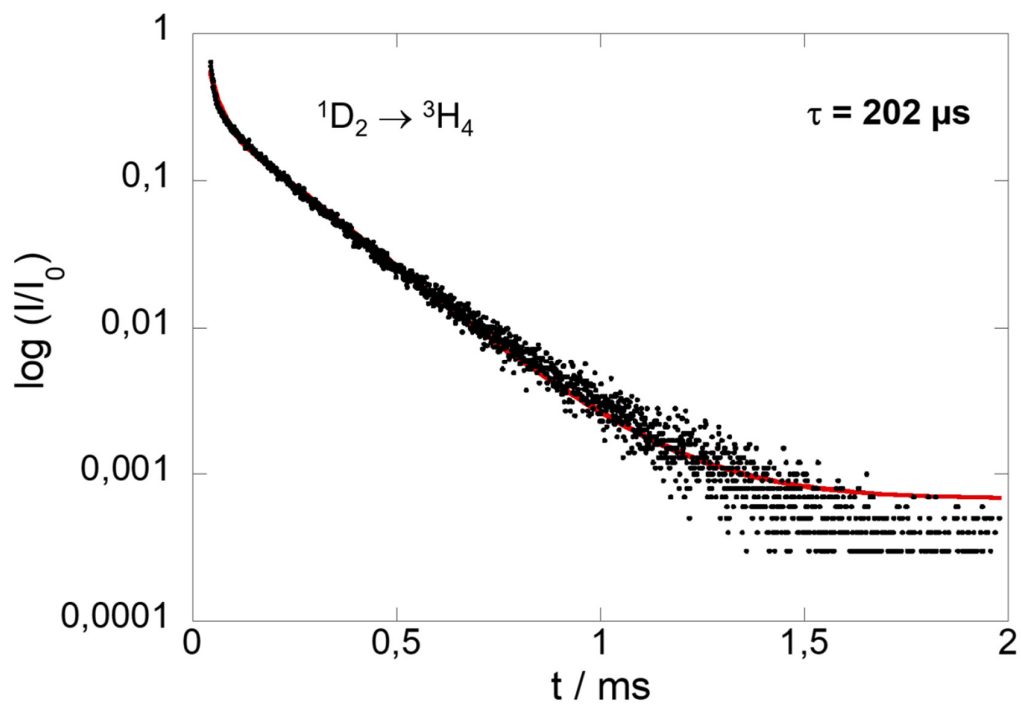

**Figure S42.** Luminescence decay curve of the  $\text{Pr}^{3+} {}^1D_2 \rightarrow {}^3H_4$  emission of  $\text{Y}_2\text{O}_3: \text{Pr}^{3+}$  NCs prepared by solvothermal method at 180 °C followed by calcination at 900 °C for 4 h.
